# Supplementary material
Source: publisher figshare collection journal article supplement (https://tandf.figshare.com/articles/dataset/_/1017004)
Supplement: Supplementary file 1 [file 3]

JOURNAL OF VERTEBRATE PALEONTOLOGY

ONLINE SUPPLEMENTARY INFORMATION

A new species of small-bodied sparassodont (Mammalia, Metatheria) from the Middle Miocene locality of Quebrada

Honda, Bolivia

RUSSELL K. ENGELMAN<sup>\*,1</sup> and DARIN A. CROFT<sup>2</sup>

<sup>1</sup>Department of Biology, Case Western Reserve University, 10900 Euclid Ave., Cleveland, Ohio 44106, U.S.A.,

neovenatoridae@gmail.com

<sup>2</sup>Department of Anatomy, Case Western Reserve University School of Medicine, 10900 Euclid Ave., Cleveland, Ohio

44106-4930, U.S.A., dcroft@case.edu

\*Corresponding author

## **CONTENTS**

TABLE 1S – Canine proportions supplementary data

TABLE 2S – Infraorbital foramen supplementary data

TABLE 3S – Molar row lengths supplementary data

TABLE 4S – Measurements of m2 from Laventan-Marplatan predatory marsupials

SUPPLEMENTARY INFORMATION LITERATURE CITED

APPENDIX 2S - List of Characters used in phylogenetic analysis and changes in character coding from Forasiepi (2009)

TABLE 1S. Canine measurements of sparassodonts, the thylacinid *Thylacinus cynocephalus*, and the dasyurid *Sarcophilus harrisii*. Canine length/width ratio is calculated by dividing maximum anteroposterior length at the base of the canine by maximum mediolateral width at the same point. In *Arctodictis munizi*, the greatest length and greatest width of the canine is used instead of anteroposterior length and mediolateral width, respectively, as this taxon has canines that are oriented obliquely to the tooth row. Relative size of the canines is calculated by scaling the cross sectional area of the canine by the length of M3 squared. Anatomical abbreviations: AP, anteroposterior diameter; ML, mediolateral diameter. All measurements in millimeters.

| Taxon                                       | Specimen              | Group               | AP   | ML   | AP/ML Ratio | Length of M3 | Relative Size |
|---------------------------------------------|-----------------------|---------------------|------|------|-------------|--------------|---------------|
| <i>Acrocyon riggsi</i>                      | FMNH P13433           | Borhyaenidae        | 15.0 | 11.0 | 1.36        | 12.8         | 0.79          |
| <i>Acyon myctoderos</i>                     | MNHN-Bol-V-003668 (l) | Hathliacynidae      | 8.8  | 6.3  | 1.40        | 12.5         | 0.28          |
| <i>Acyon myctoderos</i>                     | MNHN-Bol-V-003668 (r) | Hathliacynidae      | 9.1  | 6.3  | 1.44        | 12.5         | 0.29          |
| <i>Arctodictis munizi</i>                   | CORD-PZ 1210-1/5      | Borhyaenidae        | 24.6 | 17.3 | 1.42        | 16.0         | 1.31          |
| <i>Arctodictis sinclairi</i>                | MLP 85-VII-3-1 (r)    | Borhyaenidae        | 17.7 | 13.9 | 1.27        | 13.7         | 1.03          |
| <i>Arctodictis sinclairi</i>                | MLP 85-VII-3-1 (l)    | Borhyaenidae        | 18.6 | 14.1 | 1.32        | 13.7         | 1.10          |
| <i>Arminiheringia auceta</i>                | MACN A 10972          | Proborhyaenidae     | 19.6 | 13.2 | 1.48        | 15.5         | 0.85          |
| <i>Borhyaena tuberata</i>                   | MACN A 6203-6265 (r)  | Borhyaenidae        | 14.8 | 10.1 | 1.47        | 14.4         | 0.57          |
| <i>Borhyaena tuberata</i>                   | MACN A 6203-6265 (l)  | Borhyaenidae        | 14.9 | 10.2 | 1.46        | 14.4         | 0.58          |
| <i>Borhyaena tuberata</i>                   | MACN A 5780           | Borhyaenidae        | 15.5 | 10.2 | 1.52        | N/A          | N/A           |
| <i>Borhyaenidium riggsi</i>                 | FMNH 14409            | Hathliacynidae      | 4.0  | 2.8  | 1.43        | 7.30         | 0.17          |
| <i>Callistoe vincei</i>                     | PVL 4187              | Proborhyaenidae     | 20.0 | 14.5 | 1.38        | 13.3         | 1.29          |
| <i>Cladosictis centralis</i>                | MACN A 11639          | Hathliacynidae      | 9.0  | 5.5  | 1.64        | 8.4          | 0.55          |
| <i>Cladosictis patagonica</i>               | MACN A 5927           | Hathliacynidae      | 10.0 | 6.7  | 1.49        | 9.00         | 0.65          |
| <i>Hondadelphys fieldsi</i>                 | UCMP 37960            | Basal Sparassodonta | 8.5  | 4.7  | 1.81        | 7.9          | 0.50          |
| <i>'Lycopsis' longirostris</i> (juvenile)   | UCMP 38061            | Basal Borhyaenoid   | 10.0 | 7.9  | 1.27        | 17.5         | 0.20          |
| <i>Pharsophorus antiquus</i>                | MACN A 52-532         | Basal Borhyaenoid   | 24.5 | 16.7 | 1.47        | N/A          | N/A           |
| <i>Proborhyaena gigantea</i>                | MLP 79-XII-18-1       | Proborhyaenidae     | 29.2 | 16.7 | 1.75        | N/A          | N/A           |
| <i>Prothylacynus patagonicus</i>            | MACN Pv 14453 (r)     | Basal Borhyaenoid   | 11.4 | 7.7  | 1.48        | 12.5         | 0.44          |
| <i>Prothylacynus patagonicus</i>            | MACN Pv 14453 (l)     | Basal Borhyaenoid   | 11.0 | 7.8  | 1.41        | 12.2         | 0.45          |
| <i>Prothylacynus patagonicus</i> (juvenile) | MACN A 5931           | Basal Borhyaenoid   | 9.2  | 7.3  | 1.26        | 12.3         | 0.35          |
| <i>Sipalocyon externa</i>                   | MACN A 52-383         | Hathliacynidae      | 5.6  | 3.9  | 1.44        | 6.5          | 0.41          |
| Sparassodonta gen. et sp. nov.              | UF 27881              | Basal Sparassodonta | 4.4  | 3.6  | 1.24        | 4.44         | 0.63          |

|                                        |              |                 |      |      |      |      |      |
|----------------------------------------|--------------|-----------------|------|------|------|------|------|
| <i>Thylacosmilus atrox</i>             | FMNH P14474  | Thylacosmilidae | 28.0 | 11.0 | 2.55 | 16.0 | 0.94 |
| <i>Thylacosmilus atrox</i>             | FMNH P14531  | Thylacosmilidae | 35.0 | 14.0 | 2.5  | 20.0 | 0.96 |
| <i>Thylacosmilus atrox</i>             | MLP 35-X-4-1 | Thylacosmilidae | 28.4 | 11.6 | 2.45 | N/A  | N/A  |
| <i>Thylacosmilus atrox</i>             | MMP 1470     | Thylacosmilidae | 21.0 | 8.0  | 2.63 | 15.5 | N/A  |
| <i>Thylacinus cynocephalus</i> (left)  | CMNH 18916   | Thylacinidae    | 11.7 | 8.3  | 1.41 | 14.8 | 0.35 |
| <i>Thylacinus cynocephalus</i> (right) | CMNH 18916   | Thylacinidae    | 11.7 | 8.7  | 1.34 | 14.6 | 0.38 |
| <i>Sarcophilus harrisii</i> (left)     | CMNH 18915   | Dasyuridae      | 8.7  | 7.8  | 1.12 | 11.7 | 0.50 |
| <i>Sarcophilus harrisii</i> (right)    | CMNH 18915   | Dasyuridae      | 8.8  | 7.8  | 1.13 | 11.4 | 0.53 |

TABLE 2S. Measurements of the infraorbital foramen (IOF) in UF 27881, didelphoids, and two additional sparassodonts. Measurements of *Prothylacynus patagonicus* and '*Lycopsis*' *longirostris* are taken from Marshall (1979) and Marshall (1977a) respectively. All other measurements are taken directly from the specimens in question. Dietary information for living didelphoids is from Vieira and Astúa Moraes (2003). Abbreviations: X-Sec IOF, cross-section of infraorbital foramen; ML, mediolateral length of infraorbital foramen; DV, dorsoventral length of infraorbital foramen; PL, palatal length (from the posterior edge of the canine to the posterior end of the palate); R1, ratio calculated from palatal length; R2, ratio calculated from M1 length.

| Species                              | Specimen       | X-Sec<br>IOF | ML   |       |         | DV   |       |         | Diet                             |
|--------------------------------------|----------------|--------------|------|-------|---------|------|-------|---------|----------------------------------|
|                                      |                |              | Left | Right | Average | Left | Right | Average |                                  |
| Sparassodonta<br>gen. et sp.<br>nov. | UF 27881       | 5.39         | 2.71 | 2.43  | 2.57    | 2.54 | 2.80  | 2.67    | Hypercarnivorous?                |
| <i>Caluromys<br/>derbianus</i>       | FMNH<br>69327  | 1.36         | 1.01 | 1.05  | 1.03    | 1.75 | 1.60  | 1.68    | Frugivorous                      |
| <i>Caluromys<br/>lanatus</i>         | FMNH<br>114649 | 1.23         | 0.91 | 1.08  | 0.995   | 1.67 | 1.49  | 1.58    | Frugivorous                      |
| <i>Caluromys<br/>philander</i>       | FMNH<br>92037  | 1.16         | 0.82 | 0.90  | 0.86    | 1.66 | 1.77  | 1.72    | Frugivorous                      |
| <i>Chironectes<br/>minimus</i>       | FMNH<br>19349  | 3.52         | 1.94 | 2.04  | 1.99    | 2.16 | 2.35  | 2.26    | Hypercarnivorous/<br>Durophagous |
| <i>Chironectes<br/>minimus</i>       | FMNH<br>69329  | 3.61         | 1.73 | 1.84  | 1.785   | 2.90 | 2.25  | 2.58    | Hypercarnivorous/<br>Durophagous |
| <i>Didelphis<br/>virginiana</i>      | CMNH<br>18880  | 3.57         | 2.27 | 2.65  | 2.46    | 1.95 | 1.75  | 1.85    | Omnivorous                       |
| <i>Didelphis<br/>virginiana</i>      | CMNH<br>19220  | 2.55         | 1.96 | 1.97  | 1.965   | 1.7  | 1.61  | 1.66    | Omnivorous                       |
| <i>Lutreolina<br/>crassicauda</i>    | FMNH<br>53944  | 2.03         | 1.32 | 1.12  | 1.22    | 2.09 | 2.14  | 2.12    | Hypercarnivorous                 |
| <i>Metachirus<br/>nudicaudatus</i>   | CMNH<br>18891  | 0.78         | 1.39 | 1.25  | 1.32    | 0.82 | 0.68  | 0.75    | Omnivorous/<br>Insectivorous     |
| <i>Marmosa<br/>demerarae</i>         | CMNH<br>18894  | 0.60         | 1.09 | 1.15  | 1.12    | 0.65 | 0.72  | 0.69    | Omnivorous                       |

|                                  |               |       |      |       |       |      |      |      |                   |
|----------------------------------|---------------|-------|------|-------|-------|------|------|------|-------------------|
| <i>Marmosa murina</i>            | CMNH 18878    | 0.60  | 1.10 | 1.08  | 1.09  | 0.71 | 0.69 | 0.70 | Omnivorous        |
| <i>Prothylacynus patagonicus</i> | MACN Pv 14453 | 31.81 | N/A  | 9.00  | 9.00  | N/A  | 4.50 | 4.50 | Hypercarnivorous? |
| <i>'Lycopsis' longirostris</i>   | UCMP 38061    | 36.13 | N/A  | 11.50 | 11.50 | N/A  | 4.00 | 4.00 | Hypercarnivorous? |

| Species                        | Specimen    | PAL   | R1   | Length of M1 |       |         | R2   | Average Ratio | Diet                             |
|--------------------------------|-------------|-------|------|--------------|-------|---------|------|---------------|----------------------------------|
|                                |             |       |      | Left         | Right | Average |      |               |                                  |
| Sparassodonta gen. et sp. nov. | UF 27881    | 30.07 | 0.60 | 4.38         | 4.41  | 4.40    | 0.28 | 0.44          | Hypercarnivorous?                |
| <i>Caluromys derbianus</i>     | FMNH 69327  | 25.15 | 0.21 | 2.54         | 2.65  | 2.60    | 0.20 | 0.21          | Frugivorous                      |
| <i>Caluromys lanatus</i>       | FMNH 114649 | 22.73 | 0.24 | 2.58         | 2.66  | 2.62    | 0.18 | 0.21          | Frugivorous                      |
| <i>Caluromys philander</i>     | FMNH 92037  | 23.24 | 0.21 | 2.54         | 2.49  | 2.52    | 0.18 | 0.20          | Frugivorous                      |
| <i>Chironectes minimus</i>     | FMNH 19349  | 33.16 | 0.32 | 3.91         | 3.96  | 3.94    | 0.23 | 0.27          | Hypercarnivorous/<br>Durophagous |
| <i>Chironectes minimus</i>     | FMNH 69329  | 35.30 | 0.29 | 4.02         | 4.01  | 4.02    | 0.22 | 0.26          | Hypercarnivorous/<br>Durophagous |
| <i>Didelphis virginiana</i>    | CMNH 18880  | 45.91 | 0.17 | 4.92         | 4.71  | 4.82    | 0.15 | 0.16          | Omnivorous                       |
| <i>Didelphis virginiana</i>    | CMNH 19220  | 34.95 | 0.21 | 4.86         | 4.76  | 4.81    | 0.11 | 0.16          | Omnivorous                       |
| <i>Lutreolina crassicauda</i>  | FMNH 53944  | 24.71 | 0.33 | 2.94         | 3.04  | 2.99    | 0.23 | 0.28          | Hypercarnivorous                 |
| <i>Metachirus nudicaudatus</i> | CMNH 18891  | 20.75 | 0.18 | 2.46         | 2.41  | 2.44    | 0.13 | 0.16          | Omnivorous/<br>Insectivorous     |

|                                  |               |       |      |      |       |       |      |      |                   |
|----------------------------------|---------------|-------|------|------|-------|-------|------|------|-------------------|
| <i>Marmosa demerarae</i>         | CMNH 18894    | 17.46 | 0.20 | 2.70 | 2.49  | 2.60  | 0.09 | 0.14 | Omnivorous        |
| <i>Marmosa murina</i>            | CMNH 18878    | 17.73 | 0.19 | 2.37 | 2.35  | 2.36  | 0.11 | 0.15 | Omnivorous        |
| <i>Prothylacynus patagonicus</i> | MACN Pv 14453 | 90.00 | 0.39 | 9.80 | 9.90  | 9.85  | 0.33 | 0.36 | Hypercarnivorous? |
| <i>'Lycopsis' longirostris</i>   | UCMP 38061    | 98.18 | 0.37 | -    | 13.10 | 13.10 | 0.21 | 0.29 | Hypercarnivorous? |

---

TABLE 3S. Upper (M1-3) and lower (m1-4) molar row measurements of sparassodonts used in Figure 7. In specimens for which either the upper or lower molar row length is unknown, these values are estimated based on a regression equation of all sparassodonts (except proborhyaenids) for which associated upper and lower molar dentitions are known. Estimated values are highlighted in yellow. The regression equation for upper molar row length (M1-3) based on lower molar row length (m1-4) is

$$y = 1.2196x + 1.858$$

whereas the regression equation for lower molar row length (m1-4) based on upper molar row length (M1-3) is

$$y = 0.8216x - 1.2317$$

| Specimen                            | Group          | Reference              | Average Length of M1-3 | Average Length of m1-4 |
|-------------------------------------|----------------|------------------------|------------------------|------------------------|
| <b><i>Acrocyon riggsi</i></b>       |                |                        |                        |                        |
| FMNH P13433                         | Borhyaenidae   | Marshall, 1978         | 34.30                  | 43.69                  |
| Average                             |                |                        | 34.30                  | 43.69                  |
| <b><i>Acyon ?herrerai</i></b>       |                |                        |                        |                        |
| FMNH P13521                         | Hathliacynidae | Marshall, 1981         | 29.08                  | 37.30                  |
| Average                             |                |                        | 29.08                  | 37.30                  |
| <b><i>Acyon myctoderos</i></b>      |                |                        |                        |                        |
| MNHN-Bol-V-003668                   | Hathliacynidae | Forasiepi et al., 2006 | 31.71                  | 37.80                  |
| Average                             |                |                        | 31.71                  | 37.80                  |
| <b><i>Acyon tricuspoidatus</i></b>  |                |                        |                        |                        |
| MACN 11-64                          | Hathliacynidae | Marshall, 1981         | 28.43                  | 36.50                  |
| Average                             |                |                        | 28.43                  | 36.50                  |
| <b><i>Arctodictis munizi</i></b>    |                |                        |                        |                        |
| MLP 11-65                           | Borhyaenidae   | Marshall, 1978         | 47.00                  | 60.60                  |
| MACN A 5915                         | Borhyaenidae   | Marshall, 1978         | 53.21                  | 67.00                  |
| MACN A 5919                         | Borhyaenidae   | Marshall, 1978         | 50.77                  | 64.00                  |
| MLP 11-85                           | Borhyaenidae   | Marshall, 1978         | 49.96                  | 63.00                  |
| Average                             |                |                        | 50.24                  | 63.65                  |
| <b><i>Arctodictis sinclairi</i></b> |                |                        |                        |                        |



|                                         |                 |                    |       |       |
|-----------------------------------------|-----------------|--------------------|-------|-------|
| MLP 85-VII-3-1                          | Borhyaenidae    | Forasiepi, 2009    | 34.70 | 44.00 |
| Average                                 |                 |                    | 34.70 | 44.00 |
| <b><i>Arminiheringia auceta</i></b>     |                 |                    |       |       |
| MACN A 10970-10972                      | Proborhyaenidae | Present Study      | 48.00 | 56.00 |
| Average                                 |                 |                    | 48.00 | 56.00 |
| <b><i>Borhyaena macrodonta</i></b>      |                 |                    |       |       |
| MACN A 52-390                           | Borhyaenidae    | Marshall, 1978     | 40.30 | 50.00 |
| Average                                 |                 |                    | 40.30 | 50.00 |
| <b><i>Borhyaena tuberata</i></b>        |                 |                    |       |       |
| MACN A 9341-9342                        | Borhyaenidae    | Marshall, 1978     | 39.80 | 50.50 |
| MACN A 9344-9349                        | Borhyaenidae    | Marshall, 1978     | 40.95 | 51.50 |
| MACN A 5870                             | Borhyaenidae    | Marshall, 1978     | 38.50 | 48.81 |
| MACN A 5922                             | Borhyaenidae    | Marshall, 1978     | 40.30 | 51.01 |
| MACN A 6203-6265                        | Borhyaenidae    | Marshall, 1978     | 41.00 | 51.86 |
| MACN A 9340                             | Borhyaenidae    | Marshall, 1978     | 40.30 | 51.01 |
| Average                                 |                 |                    | 40.14 | 50.78 |
| <b><i>Borhyaenidium musteloides</i></b> |                 |                    |       |       |
| MLP 57-X-10-153                         | Hathliacynidae  | Marshall, 1981     | 15.50 | 22.45 |
| Average                                 |                 |                    | 15.50 | 22.45 |
| <b><i>Borhyaenidium riggsi</i></b>      |                 |                    |       |       |
| FMNH P14409                             | Hathliacynidae  | Marshall, 1981     | 18.20 | 24.20 |
| Average                                 |                 |                    | 18.20 | 24.20 |
| <b><i>Callistoe vincei</i></b>          |                 |                    |       |       |
| PVL 4187                                | Proborhyaenidae | Babot et al., 2002 | 35.35 | 51.27 |
| Average                                 |                 |                    | 35.35 | 51.27 |
| <b><i>Cladosictis centralis</i></b>     |                 |                    |       |       |
| MNHN col. 4                             | Hathliacynidae  | Marshall, 1981     | 23.00 | 29.20 |
| Average                                 |                 |                    | 23.00 | 29.20 |
| <b><i>Cladosictis patagonica</i></b>    |                 |                    |       |       |
| MACN A 5927-5928                        | Hathliacynidae  | Marshall, 1981     | 24.35 | 30.50 |
| MACN A 86                               | Hathliacynidae  | Marshall, 1981     | 25.00 | 32.35 |

|                                       |                     |                        |       |       |
|---------------------------------------|---------------------|------------------------|-------|-------|
| MACN A 2079                           | Hathliacynidae      | Marshall, 1981         | 23.00 | 29.91 |
| MACN A 5950                           | Hathliacynidae      | Marshall, 1981         | 23.40 | 30.40 |
| MACN A 6280                           | Hathliacynidae      | Marshall, 1981         | 23.00 | 29.91 |
| MACN A 9350                           | Hathliacynidae      | Marshall, 1981         | 22.20 | 28.93 |
| AMNH 9134                             | Hathliacynidae      | Marshall, 1981         | 24.80 | 32.10 |
| MACN A 674                            | Hathliacynidae      | Marshall, 1981         | 24.12 | 31.20 |
| AMNH 9548                             | Hathliacynidae      | Marshall, 1981         | 23.11 | 29.95 |
| MLP 11-10                             | Hathliacynidae      | Marshall, 1981         | 24.61 | 31.80 |
| MLP 11-13                             | Hathliacynidae      | Marshall, 1981         | 24.12 | 31.20 |
| MACN A 6288                           | Hathliacynidae      | Marshall, 1981         | 25.58 | 33.00 |
| MACN A 9360                           | Hathliacynidae      | Marshall, 1981         | 22.74 | 29.50 |
| MLP 11-63                             | Hathliacynidae      | Marshall, 1981         | 23.15 | 30.00 |
| Average                               |                     |                        | 23.80 | 30.77 |
| <b><i>Hondadelphys fieldsi</i></b>    |                     |                        |       |       |
| UCMP 37960                            | Basal Sparassodonta | Marshall, 1976a        | 21.80 | 31.00 |
| IGM 253049                            | Basal Sparassodonta | Goin, 1997a            | 21.85 | 28.40 |
| IGM 253079                            | Basal Sparassodonta | Goin, 1997a            | 20.55 | 26.80 |
| IGM 253030                            | Basal Sparassodonta | Goin, 1997a            | 20.87 | 27.20 |
| Average                               |                     |                        | 21.27 | 28.35 |
| <b><i>?Hondadelphys sp.</i></b>       |                     |                        |       |       |
| IGM 184041                            | Basal Sparassodonta | Goin, 1997a            | 20.30 | 26.50 |
| Average                               |                     |                        | 20.30 | 26.50 |
| <b><i>Lycopsis torresi</i></b>        |                     |                        |       |       |
| MLP 11-113                            | Basal Borhyaenoid   | Marshall, 1979         | 40.55 | 49.70 |
| MACN A 5930                           | Basal Borhyaenoid   | Marshall, 1979         | 39.40 | 50.00 |
| Average                               |                     |                        | 39.97 | 49.85 |
| <b><i>'Lycopsis' longirostrus</i></b> |                     |                        |       |       |
| UCMP 38061                            | Basal Borhyaenoid   | Marshall, 1979         | 45.60 | 58.00 |
| Average                               |                     |                        | 45.60 | 58.00 |
| <b><i>'Lycopsis' viverensis</i></b>   |                     |                        |       |       |
| MMH 87-6-1                            | Basal Borhyaenoid   | Forasiepi et al., 2003 | 34.77 | 44.26 |
| MMH 95-6-1                            | Basal Borhyaenoid   | Forasiepi et al., 2003 | 33.39 | 42.60 |

|                                        |                     |                               |       |       |
|----------------------------------------|---------------------|-------------------------------|-------|-------|
| Average                                |                     |                               | 34.08 | 43.43 |
| <b><i>Notictis ortizi</i></b>          |                     |                               |       |       |
| MACN Pv 3996                           | Hathliacynidae      | Marshall, 1981                | 14.21 | 19.00 |
| Average                                |                     |                               | 14.21 | 19.00 |
| <b><i>Notogale mitis</i></b>           |                     |                               |       |       |
| SAL 668                                | Hathliacynidae      | Villarroel and Marshall, 1982 | 22.33 | 29.00 |
| Average                                |                     |                               | 22.33 | 29.00 |
| <b><i>Patagosmilus goini</i></b>       |                     |                               |       |       |
| MLP 07-VII-1-1                         | Thylacosmilidae     | Forasiepi and Carlini, 2010   | 39.21 | 49.68 |
| Average                                |                     |                               | 39.21 | 49.68 |
| <b><i>Patene coluapiensis</i></b>      |                     |                               |       |       |
| AMNH 28448                             | Basal Sparassodonta | Marshall, 1981                | 21.40 | 27.96 |
| Average                                |                     |                               | 21.40 | 27.96 |
| <b><i>Patene simpsoni</i></b>          |                     |                               |       |       |
| PVL 2618                               | Basal Sparassodonta | Goin et al., 1986             | 11.69 | 15.90 |
| MNRJ 1331-V                            | Basal Sparassodonta | Marshall, 1981                | 15.20 | 20.40 |
| DGM 324-M                              | Basal Sparassodonta | Marshall, 1981                | 14.61 | 19.49 |
| MNRJ 1351-V                            | Basal Sparassodonta | Marshall, 1981                | 15.75 | 20.90 |
| Average                                |                     |                               | 14.31 | 19.17 |
| <b><i>Perathereutes pungens</i></b>    |                     |                               |       |       |
| MACN A 684                             | Hathliacynidae      | Marshall, 1981                | 15.02 | 20.00 |
| Average                                |                     |                               | 15.02 | 20.00 |
| <b><i>Pharsophorus lacerans</i></b>    |                     |                               |       |       |
| MACN A 52-391                          | Basal Borhyaenoid   | Patterson and Marshall, 1978  | 43.95 | 55.60 |
| MACN A 11653                           | Basal Borhyaenoid   | Marshall, 1978                | 41.84 | 53.00 |
| Average                                |                     |                               | 42.89 | 54.30 |
| <b><i>Pharsophorus tenax</i></b>       |                     |                               |       |       |
| AC 3192                                | Basal Borhyaenoid   | Marshall, 1978                | 35.50 | 45.15 |
| AC 3004                                | Basal Borhyaenoid   | Marshall, 1978                | 37.77 | 48.00 |
| Average                                |                     |                               | 36.64 | 46.58 |
| <b><i>"Plesiofelis" schlosseri</i></b> |                     |                               |       |       |

|                                         |                   |                              |       |       |
|-----------------------------------------|-------------------|------------------------------|-------|-------|
| MLP 11-114                              | Basal Borhyaenoid | Marshall, 1978               | 46.39 | 58.60 |
| Average                                 |                   |                              | 46.39 | 58.60 |
| <b><i>Proborhyaena gigantea</i></b>     |                   |                              |       |       |
| MLP 79-XII-18-1                         | Proborhyaenidae   | Bond and Pascual, 1983       | 64.70 | 80.77 |
| MACN A 52-382                           | Proborhyaenidae   | Present Study                | 72.06 | 90.20 |
| Average                                 |                   |                              | 68.38 | 85.48 |
| <b><i>Procladosictis anomala</i></b>    |                   |                              |       |       |
| MACN A 10327                            | Hathliacynidae    | Marshall, 1981               | 21.28 | 27.81 |
| Average                                 |                   |                              | 21.28 | 27.81 |
| <b><i>Prothylacynus patagonicus</i></b> |                   |                              |       |       |
| MACN A 706-707                          | Basal Borhyaenoid | Marshall, 1979               | 36.00 | 47.30 |
| MLP 11-38                               | Basal Borhyaenoid | Marshall, 1979               | 37.37 | 47.50 |
| MACN A 5926                             | Basal Borhyaenoid | Marshall, 1979               | 38.99 | 49.50 |
| MACN A 5931                             | Basal Borhyaenoid | Marshall, 1979               | 36.50 | 46.37 |
| MACN Pv 14453                           | Basal Borhyaenoid | Marshall, 1979               | 33.90 | 43.20 |
| Average                                 |                   |                              | 36.55 | 46.78 |
| <b><i>Pseudonotictis pusillus</i></b>   |                   |                              |       |       |
| MLP 11-26                               | Hathliacynidae    | Marshall, 1981               | 13.56 | 18.20 |
| Average                                 |                   |                              | 13.56 | 18.20 |
| <b><i>Pseudothylacynus rectus</i></b>   |                   |                              |       |       |
| MACN A 52-369                           | Hathliacynidae    | Marshall, 1979               | 32.41 | 41.40 |
| MNHN col. 5                             | Hathliacynidae    | Marshall, 1979               | 33.47 | 42.70 |
| Average                                 |                   |                              | 32.94 | 42.05 |
| <b><i>Sallacyon hoffstetteri</i></b>    |                   |                              |       |       |
| MNHN SAL 93                             | Hathliacynidae    | Petter and Hoffstetter, 1983 | 15.83 | 21.00 |
| Average                                 |                   |                              | 15.83 | 21.00 |
| <b><i>Sipalocyon externa</i></b>        |                   |                              |       |       |
| MACN A 52-383                           | Hathliacynidae    | Marshall, 1981               | 18.40 | 24.30 |
| Average                                 |                   |                              | 18.40 | 24.30 |
| <b><i>Sipalocyon gracilis</i></b>       |                   |                              |       |       |
| MACN A 691-703                          | Hathliacynidae    | Marshall, 1981               | 20.50 | 25.95 |

|                                                    |                     |                       |       |       |
|----------------------------------------------------|---------------------|-----------------------|-------|-------|
| PU 15373                                           | Hathliacynidae      | Marshall, 1981        | 18.60 | 23.00 |
| MACN A 5952-5953                                   | Hathliacynidae      | Marshall, 1981        | 19.45 | 25.58 |
| MACN A 5958                                        | Hathliacynidae      | Marshall, 1981        | 22.00 | 28.69 |
| MACN A 5959                                        | Hathliacynidae      | Marshall, 1981        | 19.80 | 26.01 |
| MACN A 9352                                        | Hathliacynidae      | Marshall, 1981        | 21.60 | 28.20 |
| FMNH P13777                                        | Hathliacynidae      | Marshall, 1981        | 22.60 | 29.42 |
| PU 15418                                           | Hathliacynidae      | Marshall, 1981        | 22.00 | 28.69 |
| AMNH 9254                                          | Hathliacynidae      | Marshall, 1981        | 19.40 | 25.52 |
| MLP 11-25                                          | Hathliacynidae      | Marshall, 1981        | 17.95 | 23.60 |
| MLP 11-7                                           | Hathliacynidae      | Marshall, 1981        | 18.60 | 24.40 |
| MACN A 5957                                        | Hathliacynidae      | Marshall, 1981        | 19.90 | 26.00 |
| MACN A 5964                                        | Hathliacynidae      | Marshall, 1981        | 19.00 | 24.90 |
| MACN A 5965                                        | Hathliacynidae      | Marshall, 1981        | 19.08 | 25.00 |
| MACN A 5938-5949                                   | Hathliacynidae      | Marshall, 1981        | 17.25 | 22.75 |
| Average                                            |                     |                       | 19.85 | 25.85 |
| <b><i>Sipalocyon obusta</i></b>                    |                     |                       |       |       |
| MACN A 686                                         | Hathliacynidae      | Marshall, 1981        | 18.84 | 24.70 |
| Average                                            |                     |                       | 18.84 | 24.70 |
| <b><i>Sparassodonta</i> gen. et sp. nov.</b>       |                     |                       |       |       |
| UF 27881                                           | Basal Sparassodonta | Present Study         | 14.18 | 19.15 |
| Average                                            |                     |                       | 14.18 | 19.15 |
| <b><i>Sparassodonta</i> aff. <i>Stylocynus</i></b> |                     |                       |       |       |
| PVL 4651                                           | Basal Sparassodonta | Babot and Ortiz, 2008 | 38.26 | 48.60 |
| Average                                            |                     |                       | 38.26 | 48.60 |
| <b><i>Stylocynus paranensis</i></b>                |                     |                       |       |       |
| MLP 11-94                                          | Basal Sparassodonta | Marshall, 1979        | 44.27 | 56.00 |
| Average                                            |                     |                       | 44.27 | 56.00 |
| <b><i>Thylacosmilus atrox</i></b>                  |                     |                       |       |       |
| FMNH P14474                                        | Thylacosmilidae     | Marshall, 1976b       | 44.00 | 55.52 |
| FMNH P14344                                        | Thylacosmilidae     | Marshall, 1976b       | 41.43 | 52.50 |
| Average                                            |                     |                       | 42.71 | 54.01 |

TABLE 4S – Second lower molar (m2) measurements of middle Miocene-late Pliocene (Laventan-Marplatan SALMAs) sparassodonts and didelphoids used in Figure 11. Species for which m2 is not known had their values estimated based the proportions of other teeth and/or m2 of related taxa. These estimated values are highlighted in yellow. The holotype of *Borhyaenidium riggsi* has been regarded as either Chapadmalalan (Prevosti et al., 2013) or Montehermosan (Reguero and Candela, 2011) in age, and this uncertainty has been taken into account in this table and the corresponding figure in the paper (Figure 8). All measurements are in mm.

| <b>Taxon</b>                            | <b>Specimen</b>       | <b>Group</b>  | <b>Family</b>       | <b>SALMA</b> | <b>Length of m2</b> | <b>Reference</b>       |
|-----------------------------------------|-----------------------|---------------|---------------------|--------------|---------------------|------------------------|
| <i>Acyon myctoderos</i>                 | MNHN-Bol-V-003668 (l) | Sparassodonta | Hathliacynidae      | Laventan     | 10.05               | Forasiepi et al., 2006 |
| <i>Acyon myctoderos</i>                 | MNHN-Bol-V-003668 (r) | Sparassodonta | Hathliacynidae      | Laventan     | 9.70                | Forasiepi et al., 2006 |
| <i>Anachlysictis gracilis</i>           | IGM 184247            | Sparassodonta | Thylacosmilidae     | Laventan     | 10.20               | Goin, 1997a            |
| <i>Dukecynus magnus</i>                 | IGM 251149            | Sparassodonta | Basal Borhyaenoid   | Laventan     | 15.50               | Goin, 1997a            |
| <i>Hondadelphys fieldsi</i>             | IGM 250833            | Sparassodonta | Basal Sparassodonta | Laventan     | 6.80                | Goin, 1997a            |
| <i>Hondadelphys fieldsi</i>             | IGM 253050            | Sparassodonta | Basal Sparassodonta | Laventan     | 6.90                | Goin, 1997a            |
| <i>Hondadelphys fieldsi</i>             | IGM 253049            | Sparassodonta | Basal Sparassodonta | Laventan     | 6.80                | Goin, 1997a            |
| <i>Hondadelphys fieldsi</i>             | IGM 253078            | Sparassodonta | Basal Sparassodonta | Laventan     | 8.00                | Goin, 1997a            |
| <i>Hondadelphys fieldsi</i>             | IGM 253079            | Sparassodonta | Basal Sparassodonta | Laventan     | 6.80                | Goin, 1997a            |
| <i>Hondadelphys fieldsi</i>             | UCMP 39251 (r)        | Sparassodonta | Basal Sparassodonta | Laventan     | 7.80                | Marshall, 1976a        |
| <i>Hondadelphys fieldsi</i>             | UCMP 39251 (l)        | Sparassodonta | Basal Sparassodonta | Laventan     | 7.70                | Marshall, 1976a        |
| ? <i>Hondadelphys</i> sp.               | IGM 250942            | Sparassodonta | Basal Sparassodonta | Laventan     | 5.58                | Goin, 1997a            |
| ' <i>Lycopsis</i> ' <i>longirostrus</i> | UCMP 38061            | Sparassodonta | Basal Borhyaenoid   | Laventan     | 13.80               | Marshall, 1977a        |

|                                   |                     |               |                     |             |       |                               |
|-----------------------------------|---------------------|---------------|---------------------|-------------|-------|-------------------------------|
| <i>Marmosa laventica</i>          | IGM 184151          | Didelphoidea  | Didelphidae         | Laventan    | 2.95  | Goin, 1997a                   |
| <i>Marmosa laventica</i>          | IGM 184336          | Didelphoidea  | Didelphidae         | Laventan    | 2.60  | Goin, 1997a                   |
| <i>Marmosa laventica</i>          | UCMP 39273          | Didelphoidea  | Didelphidae         | Laventan    | 3.00  | Marshall, 1976a               |
| Sparassodonta gen. et sp. nov.    | UF 27881            | Sparassodonta | Basal Sparassodonta | Laventan    | 4.52  | Present Study                 |
| <i>Thylamys columbianus</i>       | IGM 251010          | Didelphoidea  | Didelphidae         | Laventan    | 1.85  | Goin, 1997a                   |
| <i>Thylamys columbianus</i>       | IGM 253034          | Didelphoidea  | Didelphidae         | Laventan    | 1.90  | Goin, 1997a                   |
| <i>Thylamys minutus</i>           | IGM 253032          | Didelphoidea  | Didelphidae         | Laventan    | 1.43  | Goin, 1997a                   |
| <i>Thylamys minutus</i>           | IGM 253042          | Didelphoidea  | Didelphidae         | Laventan    | 1.43  | Goin, 1997a                   |
| Unknown                           | IGM 251108          | Sparassodonta | Thylacosmilidae     | Laventan    | 7.70  | Goin, 1997a                   |
| Thylacosmilid                     |                     |               |                     |             |       |                               |
| <i>Chasicostylus castroi</i>      | MLP 57-XI-9-2       | Sparassodonta | Hathliacynidae      | Chasicoan   | 8.20  | Marshall, 1981                |
| <i>'Lycopsis' viverensis</i>      | MMH 95-6-1          | Sparassodonta | Basal Borhyaenoid   | Chasicoan   | 10.60 | Forasiepi et al., 2003        |
| <i>Pseudolycopsis cabrerai</i>    | MLP 57-XI-9-1 (l)   | Sparassodonta | Basal Borhyaenoid   | Chasicoan   | 9.60  | Marshall, 1976c               |
| <i>Pseudolycopsis cabrerai</i>    | MLP 57-XI-9-1 (r)   | Sparassodonta | Basal Borhyaenoid   | Chasicoan   | 9.60  | Marshall, 1976c               |
| Borhyaenidae indet.               | MACN Pv 13207       | Sparassodonta | Borhyaenidae        | Huayquerian | 10.50 | Marshall, 1978                |
| <i>Borhyaenidium altiplanicus</i> | ACH-243             | Sparassodonta | Hathliacynidae      | Huayquerian | 5.00  | Villarroel and Marshall, 1983 |
| <i>Borhyaenidium musteloides</i>  | MLP 57-X-10-153 (l) | Sparassodonta | Hathliacynidae      | Huayquerian | 5.40  | Marshall, 1981                |
| <i>Borhyaenidium musteloides</i>  | MLP 57-X-10-153 (r) | Sparassodonta | Hathliacynidae      | Huayquerian | 5.40  | Marshall, 1981                |

|                                  |                 |               |                     |             |       |                          |
|----------------------------------|-----------------|---------------|---------------------|-------------|-------|--------------------------|
| Didelphidae sp. indet.           | LACM 135346     | Didelphoidea  | Didelphidae         | Huayquerian | 1.51  | Czaplewski, 1996         |
| <i>Didelphis solimoensis</i>     | UFAC 5180       | Didelphoidea  | Didelphidae         | Huayquerian | 4.00  | Cozzuol et al., 2006     |
| <i>Hesperocynus dolgopola</i>    | MHNSR-PV 1046   | Didelphoidea  | Sparassocynidae     | Huayquerian | 2.90  | Forasiepi et al., 2009   |
| <i>Hesperocynus dolgopola</i>    | GHUNLPam 8629   | Didelphoidea  | Sparassocynidae     | Huayquerian | 2.74  | Goin et al., 2000        |
| <i>Hesperocynus dolgopola</i>    | GHUNLPam 14368  | Didelphoidea  | Sparassocynidae     | Huayquerian | 2.57  | Goin et al., 2000        |
| <i>Hesperocynus dolgopola</i>    | MLP 86-VII-10-1 | Didelphoidea  | Sparassocynidae     | Huayquerian | 2.86  | Goin and Montalvo, 1988  |
| <i>Hyperdidelphys pattersoni</i> | FMNH P14455     | Didelphoidea  | Didelphidae         | Huayquerian | 4.40  | Goin and Pardiñas, 1996  |
| <i>Hyperdidelphys pattersoni</i> | FMNH P14519     | Didelphoidea  | Didelphidae         | Huayquerian | 4.50  | Goin and Pardiñas, 1996  |
| <i>Hyperdidelphys pattersoni</i> | PVL 3316a       | Didelphoidea  | Didelphidae         | Huayquerian | 4.13  | Goin and Pardiñas, 1996  |
| <i>Hyperdidelphys pattersoni</i> | MACN Pv 8199    | Didelphoidea  | Didelphidae         | Huayquerian | 4.40  | Simpson, 1974            |
| <i>Hyperdidelphys pattersoni</i> | IL 3317         | Didelphoidea  | Didelphidae         | Huayquerian | 4.60  | Simpson, 1974            |
| <i>Hyperdidelphys</i> sp.        | GHUNLPam 19614  | Didelphoidea  | Didelphidae         | Huayquerian | 3.80  | Abello et al., 2002      |
| <i>Lutreolina materdei</i>       | LACM 135345     | Didelphoidea  | Didelphidae         | Huayquerian | 4.21  | Goin and Los Reyes, 2011 |
| <i>Notictis ortizi</i>           | MACN Pv 3996    | Sparassodonta | Hathliacynidae      | Huayquerian | 4.80  | Marshall, 1981           |
| <i>Stylocynus paranensis</i>     | MLP 11-94       | Sparassodonta | Basal Sparassodonta | Huayquerian | 12.41 | Marshall, 1979           |
| <i>Thylacosmilus atrox</i>       | MMP 1470        | Sparassodonta | Thylacosmilidae     | Huayquerian | 10.60 | Goin and Pascual, 1987   |
| <i>Thylacosmilus atrox</i>       | FMNH P14344     | Sparassodonta | Thylacosmilidae     | Huayquerian | 11.80 | Marshall, 1976b          |
| <i>Thylacosmilus</i>             | MACN Pv 9163    | Sparassodonta | Thylacosmilidae     | Huayquerian | 10.00 | Marshall, 1976b          |



*atrox*

|                                                   |                     |               |                     |                                 |       |                            |
|---------------------------------------------------|---------------------|---------------|---------------------|---------------------------------|-------|----------------------------|
| <i>Thylamys pinei</i>                             | GHUNLPam<br>2404    | Didelphoidea  | Didelphidae         | Huayquerian                     | 1.66  | Goin et al., 2000          |
| <i>Thylamys pinei</i>                             | GHUNLPam<br>9075    | Didelphoidea  | Didelphidae         | Huayquerian                     | 1.49  | Goin et al., 2000          |
| <i>Thylamys pinei</i>                             | GHUNLPam<br>2222    | Didelphoidea  | Didelphidae         | Huayquerian                     | 1.89  | Goin et al., 2000          |
| <i>Thylamys zettii</i>                            | MLP 66-XII-13-<br>3 | Didelphoidea  | Didelphidae         | Huayquerian                     | 1.90  | Goin, 1997b                |
| <i>Thylatheridium<br/>hudsoni</i>                 | PVM 1001            | Didelphoidea  | Didelphidae         | Huayquerian                     | 2.40  | Goin and Montalvo,<br>1988 |
| <i>Thylatheridium<br/>hudsoni</i>                 | GHUNLPam<br>300     | Didelphoidea  | Didelphidae         | Huayquerian                     | 2.49  | Goin et al., 2000          |
| <i>Thylatheridium<br/>hudsoni</i>                 | GHUNLPam<br>5129    | Didelphoidea  | Didelphidae         | Huayquerian                     | 2.32  | Goin et al., 2000          |
| <i>Thylatheridium<br/>hudsoni</i>                 | GHUNLPam<br>2195    | Didelphoidea  | Didelphidae         | Huayquerian                     | 2.66  | Goin et al., 2000          |
| <i>Thylatheridium<br/>hudsoni</i>                 | GHUNLPam<br>312     | Didelphoidea  | Didelphidae         | Huayquerian                     | 2.66  | Goin et al., 2000          |
| <i>Thylatheridium<br/>hudsoni</i>                 | GHUNLPam<br>2314    | Didelphoidea  | Didelphidae         | Huayquerian                     | 2.90  | Goin et al., 2000          |
| Unknown<br>Sparassodont aff.<br><i>Stylocynus</i> | PVL 4651            | Sparassodonta | Basal Sparassodonta | Huayquerian                     | 11.70 | Babot and Ortiz,<br>2008   |
| <i>Zygolestes<br/>paranensis</i>                  | MACN Pv 8889        | Didelphoidea  | Didelphidae         | Huayquerian                     | 1.51  | Reig, 1957                 |
| <i>Zygolestes tatei</i>                           | GHUNLPam<br>5310    | Didelphoidea  | Didelphidae         | Huayquerian                     | 1.58  | Goin et al., 2000          |
| <i>Zygolestes tatei</i>                           | GHUNLPam<br>8076    | Didelphoidea  | Didelphidae         | Huayquerian                     | 1.49  | Goin et al., 2000          |
| <i>Borhyaenidium<br/>riggsi</i>                   | FMNH P14409         | Sparassodonta | Hathliacynidae      | Montehermosan/<br>Chapadmalalan | 5.90  | Marshall, 1981             |
| <i>Chironectes</i> sp.                            | MACN Pv 2464        | Didelphoidea  | Didelphidae         | Montehermosan                   | 4.49  | Marshall, 1977b            |
| <i>Hyperdidelphys</i>                             | MACN A 1615         | Didelphoidea  | Didelphidae         | Montehermosan                   | 4.95  | Goin and Pardiñas,         |

|                                    |                  |               |                 |               |       |                               |
|------------------------------------|------------------|---------------|-----------------|---------------|-------|-------------------------------|
| <i>inexpectata</i>                 |                  |               |                 |               |       | 1996                          |
| <i>Hyperdidelphys inexpectata</i>  | MACN A 421 (l)   | Didelphoidea  | Didelphidae     | Montehermosan | 5.25  | Goin and Pardiñas, 1996       |
| <i>Hyperdidelphys inexpectata</i>  | MACN A 421 (r)   | Didelphoidea  | Didelphidae     | Montehermosan | 5.20  | Goin and Pardiñas, 1996       |
| <i>Hyperdidelphys inexpectata</i>  | MACN 7940        | Didelphoidea  | Didelphidae     | Montehermosan | 4.95  | Goin and Pardiñas, 1996       |
| <i>Hyperdidelphys inexpectata</i>  | MACN Pv 7949     | Didelphoidea  | Didelphidae     | Montehermosan | 5.05  | Goin and Pardiñas, 1996       |
| <i>Hyperdidelphys inexpectata</i>  | MACN Pv 7951     | Didelphoidea  | Didelphidae     | Montehermosan | 4.95  | Goin and Pardiñas, 1996       |
| <i>Hyperdidelphys inexpectata</i>  | MLP 91-III-1-57  | Didelphoidea  | Didelphidae     | Montehermosan | 5.28  | Goin and Pardiñas, 1996       |
| <i>Hyperdidelphys inexpectata</i>  | MACN Pv 7939     | Didelphoidea  | Didelphidae     | Montehermosan | 4.92  | Goin and Pardiñas, 1996       |
| <i>Hyperdidelphys parvula</i>      | MLP 76-IV-21-3   | Didelphoidea  | Didelphidae     | Montehermosan | 4.95  | Goin and Pardiñas, 1996       |
| <i>Hyperdidelphys parvula</i>      | MLP 91-III-1-86a | Didelphoidea  | Didelphidae     | Montehermosan | 4.87  | Goin and Pardiñas, 1996       |
| <i>Hyperdidelphys parvula</i>      | MMP 633S         | Didelphoidea  | Didelphidae     | Montehermosan | 4.44  | Goin and Pardiñas, 1996       |
| <i>Lutreolina biforata</i>         | MACN Pv 7952     | Didelphoidea  | Didelphidae     | Montehermosan | 4.50  | Reig, 1952                    |
| <i>Lutreolina tracheia</i>         | MACN Pv 7914     | Didelphoidea  | Didelphidae     | Montehermosan | 4.00  | Simpson, 1972                 |
| <i>Notocynus hermosicus</i>        | MLP 11-91        | Sparassodonta | Hathliacynidae  | Montehermosan | 5.82  | Marshall, 1981                |
| <i>Sparassocynus bahiai</i>        | MLP 11-119       | Didelphoidea  | Sparassocynidae | Montehermosan | 3.50  | Reig and Simpson, 1972        |
| <i>Sparassocynus bahiai</i>        | MACN Pv 17909    | Didelphoidea  | Sparassocynidae | Montehermosan | 3.40  | Villarroel and Marshall, 1983 |
| <i>Sparassocynus heterotopicus</i> | UM-250           | Didelphoidea  | Sparassocynidae | Montehermosan | 3.20  | Villarroel and Marshall, 1983 |
| <i>Thylacosmilus</i>               | MACN Pv 7916     | Sparassodonta | Thylacosmilidae | Montehermosan | 10.00 | Marshall, 1976b               |

|                                     |                |               |                 |               |       |                         |
|-------------------------------------|----------------|---------------|-----------------|---------------|-------|-------------------------|
| <i>atrox</i>                        |                |               |                 |               |       |                         |
| <i>Thylacosmilus atrox</i>          | MACN A 5892    | Sparassodonta | Thylacosmilidae | Montehermosan | 9.50  | Marshall, 1976b         |
| <i>Thylophorops perplanus</i>       | MLP 64-XI-12-1 | Didelphoidea  | Didelphidae     | Montehermosan | 5.47  | Goin et al., 2009       |
| <i>Didelphis crucialis</i>          | CS 634         | Didelphoidea  | Didelphidae     | Chapadmalalan | 4.80  | Reig, 1952              |
| <i>Didelphis crucialis</i>          | CS 170         | Didelphoidea  | Didelphidae     | Chapadmalalan | 4.90  | Reig, 1952              |
| <i>Didelphis crucialis</i>          | MMP 634S       | Didelphoidea  | Didelphidae     | Chapadmalalan | 5.10  | Simpson, 1972           |
| <i>Didelphis reigi</i>              | MMP 752S       | Didelphoidea  | Didelphidae     | Chapadmalalan | 5.60  | Simpson, 1972           |
| <i>Didelphis reigi</i>              | MMP 748S       | Didelphoidea  | Didelphidae     | Chapadmalalan | 6.60  | Simpson, 1972           |
| <i>Hyperdidelphys dimartinoi</i>    | MBB 11248 (l)  | Didelphoidea  | Didelphidae     | Chapadmalalan | 4.81  | Goin and Pardiñas, 1996 |
| <i>Hyperdidelphys dimartinoi</i>    | MBB 11248 (r)  | Didelphoidea  | Didelphidae     | Chapadmalalan | 4.68  | Goin and Pardiñas, 1996 |
| <i>Hyperdidelphys parvula</i>       | MACN Pv 10557  | Didelphoidea  | Didelphidae     | Chapadmalalan | 4.54  | Goin and Pardiñas, 1996 |
| <i>Hyperdidelphys parvula</i>       | MLP 328        | Didelphoidea  | Didelphidae     | Chapadmalalan | 4.93  | Goin and Pardiñas, 1996 |
| <i>Lutreolina cf. crassicaudata</i> | MMP 663M       | Didelphoidea  | Didelphidae     | Chapadmalalan | 3.80  | Simpson, 1972           |
| <i>Lutreolina cf. crassicaudata</i> | MMP 1043M      | Didelphoidea  | Didelphidae     | Chapadmalalan | 3.80  | Simpson, 1972           |
| <i>Sparassocynus derivatus</i>      | MMP 1048M      | Didelphoidea  | Sparassocynidae | Chapadmalalan | 3.00  | Reig and Simpson, 1972  |
| <i>Sparassocynus derivatus</i>      | MMP 340S       | Didelphoidea  | Sparassocynidae | Chapadmalalan | 3.10  | Reig and Simpson, 1972  |
| <i>Sparassocynus derivatus</i>      | MMP 851M       | Didelphoidea  | Sparassocynidae | Chapadmalalan | 3.50  | Reig and Simpson, 1972  |
| <i>Thylacosmilus atrox</i>          | MMP 1443       | Sparassodonta | Thylacosmilidae | Chapadmalalan | 11.50 | Goin and Pascual, 1987  |
| <i>Thylatheridium cristatum</i>     | MACN Pv 6444   | Didelphoidea  | Didelphidae     | Chapadmalalan | 2.70  | Reig, 1952              |
| <i>Thylatheridium cristatum</i>     | MACN Pv 10904  | Didelphoidea  | Didelphidae     | Chapadmalalan | 2.70  | Reig, 1952              |

|                                     |                 |              |                 |               |      |                        |
|-------------------------------------|-----------------|--------------|-----------------|---------------|------|------------------------|
| <i>Thylatheridium cristatum</i>     | CS 169          | Didelphoidea | Didelphidae     | Chapadmalalan | 2.60 | Reig, 1952             |
| <i>Thylophorops ?chapalmalensis</i> | MMP 576M        | Didelphoidea | Didelphidae     | Chapadmalalan | 9.00 | Simpson, 1972          |
| <i>Thylophorops chapalmalensis</i>  | CS 354          | Didelphoidea | Didelphidae     | Chapadmalalan | 7.00 | Reig, 1952             |
| <i>Thylophorops chapalmalensis</i>  | CS 189          | Didelphoidea | Didelphidae     | Chapadmalalan | 6.20 | Reig, 1952             |
| <i>Thylophorops chapalmalensis</i>  | MMP 354S        | Didelphoidea | Didelphidae     | Chapadmalalan | 7.70 | Simpson, 1972          |
| <i>Sparassocynus derivatus</i>      | MMP 1041M       | Didelphoidea | Sparassocynidae | Marplatan     | 3.10 | Reig and Simpson, 1972 |
| Thylamyini indet.                   | PVL 6375        | Didelphoidea | Didelphidae     | Marplatan     | 1.63 | Ortiz et al., 2012     |
| Thylamyini indet.                   | PVL 6374        | Didelphoidea | Didelphidae     | Marplatan     | 1.78 | Ortiz et al., 2012     |
| <i>Thylophorops chapalmalensis</i>  | MMP 558M        | Didelphoidea | Didelphidae     | Marplatan     | 6.70 | Simpson, 1972          |
| <i>Thylophorops lorenzinii</i>      | MLP 08-III-10-1 | Didelphoidea | Didelphidae     | Marplatan     | 8.45 | Goin et al., 2009      |

#### SUPPLEMENTARY MATERIAL LITERATURE CITED

- Abello, A., C. I. Montalvo, and F. J. Goin. 2002. Marsupiales de Mioceno Superior de Calefú (La Pampa, Argentina). *Ameghiniana* 39:433–442.
- Argot, C., and J. Babot. 2011. Postcranial morphology, functional adaptations and palaeobiology of *Callistoe vincei*, a predaceous metatherian from the Eocene of Salta, north-western Argentina. *Palaeontology* 54:447–480.
- Babot, M. J., J. E. Powell, and C. de Muizon. 2002. *Callistoe vincei*, a new Proborhyaenidae (Borhyaenoidea, Metatheria, Mammalia) from the early Eocene of Argentina. *Geobios* 35:615–629.
- Babot, M. J. and P. E. Ortiz. 2008. Primer registro de Borhyaenoidea (Mammalia, Metatheria, Sparassodonta) en la provincia de Tucumán (Formación India Muerta, Grupo Choromoro; Mioceno tardío). *Acta Geológica Lilloana* 21:34–48.
- Beck, R. M. D.. 2012. An ‘ameridelphian’ marsupial from the early Eocene of Australia supports a complex model of Southern Hemisphere marsupial biogeography. *Naturwissenschaften* 99:715–729.
- Bond, M., and R. Pascual. 1983. Nuevos y elocuentes restos craneanos de *Proborhyaena gigantea* Ameghino, 1897 (Marsupialia, Borhyaenidae, Proborhyaeninae) de la edad Deseadense. Un ejemplo de coevolucion. 20:47–60.
- Churcher, C. S. 1985. Dental functional morphology in the marsupial sabre-tooth *Thylacosmilus atrox* (Thylacosmilidae) compared to that of felid sabre-teeth. *Australian Mammalogy* 8:201–220.
- Cozzuol, M. A., F. Goin, M de los Reyes, and A. Ranzi. 2006. The oldest species of *Didelphis* (Mammalia, Marsupialia, Didelphimorphia) from the late Miocene of Amazonia. *Journal of Mammalogy* 87:663–667.
- Czaplewski, N. J. 1996. Opossums (Didelphidae) and bats (Noctilionidae and Molossidae) from the late Miocene of the Amazon Basin. *Journal of Mammalogy* 77:84–94.
- Forasiepi, A. M. 2009. Osteology of *Arctodictis sinclairi* (Mammalia, Metatheria, Sparassodonta) and phylogeny of Cenozoic metatherian carnivores from South America. *Monografías del Museo Argentino de Ciencias Naturales* 6:1–174.
- Forasiepi, A. M., and A. A. Carlini. 2010. A new thylacosmilid (Mammalia, Metatheria, Sparassodonta) from the Miocene of Patagonia, Argentina. *Zootaxa* 2552:55–68.
- Forasiepi, A. M., F. J. Goin, and V. di Martino. 2003. Una nueva especie de *Lycopsis* (Metatheria, Prothylacyninae) de la Formación Arroyo Chasicó (Mioceno tardío) de la provincia de Buenos Aires. *Ameghiniana* 40:249–253.

- Forasiepi, A. M., F. J. Goin, and A. G. Martinelli. 2009. Contribution to the knowledge of the Sparassocynidae (Mammalia, Metatheria, Didelphoidea) with comments on the age of the Aisol Formation (Neogene), Mendoza Province, Argentina. *Journal of Vertebrate Paleontology* 29(4):1252–1263.
- Forasiepi, A. M., M. R. Sánchez-Villagra, F. J. Goin, M. Takai, N. Shigehara, and R. F. Kay. 2006. A new species of Hathliacynidae (Metatheria, Sparassodonta) from the middle Miocene of Quebrada Honda, Bolivia. *Journal of Vertebrate Paleontology* 26(3):670–684.
- Goin, F. J. 1995. Los Marsupiales; pp. 165–179 in M. T. Alberdi, G. Leone, and E. P. Tonni (eds.), *Evolución Biológica y Climática de la Región Pampeana durante los Últimos Cinco Millones de Años. Un ensayo de Correlación con el Mediterráneo Occidental* Monografías del Museo Nacional de Ciencias Naturales 12, Madrid.
- Goin, F. J. 1997a. New clues for understanding Neogene marsupial radiations; pp. 185–204 in R.F. Kay, R.H. Madden, R.L. Cifelli and J. Flynn (eds.), *A History of the Neotropical fauna: Vertebrate Paleobiology of the Miocene in Colombia*. Smithsonian Institution Press, Washington D.C., U.S.A. 592 pp.
- Goin, F. J. 1997b. *Thylamys zetti*, nueva especie de marmosino (Marsupialia, Didelphidae) del Cenozoico tardío de la región pampeana. *Ameghiniana* 34:481–484.
- Goin, F. J., and R. Pascual. 1987. News on the biology and taxonomy of the marsupials Thylacosmilidae (late Tertiary of Argentina). *Anales de la Academia Nacional de Ciencias Exactas, Físicas, y Naturales de Buenos Aires* 39:219–246.
- Goin, F. J., and C. Montalvo. 1988. Revision sistemática y reconocimiento de una nueva especie del género *Thylatheridium* Reig (Marsupialia, Didelphidae). *Ameghiniana* 25:161–167.
- Goin, F. J., and U. F. J. Pardiñas. 1996. Revision de las especies del género *Hyperdidelphys* Ameghino, 1904 (Mammalia, Marsupialia, Didelphidae). Su significación filogenética, estratigráfica, y adaptativa en el Neogeno del cono sur sudamericano. *Estudios Geológicos* 52:327–359.
- Goin, F. J., and M. de los Reyes. 2011. Contribución al conocimiento de los representantes extintos de *Lutreolina* Thomas, 1910 (Mammalia, Marsupialia, Didelphidae). *Historia Natural* 1:15–25.
- Goin, F. J., C. I. Montalvo, and G. Visconti. 2000. Los marsupiales (Mammalia) del Mioceno superior de la Formación Cerro Azul (provincia de La Pampa, Argentina). *Estudios Geológicos* 56:101–126.
- Goin, F. J., R. M. Palma, R. Pascual, and J. E. Powell. 1986. Persistencia de un primitivo Borhyaenidae (Mammalia, Marsupialia) en el Eoceno temprano de Salta (Fm. Lumbreira, Argentina). Aspectos geológicos y paleoambientales relacionados. *Ameghiniana* 23:47–56.

- Goin, F. J., N. Zimicz, M. de Los Reyes, and L. Soibelzon. 2009. A new large didelphid of the genus *Thylophorops* (Mammalia:Didelphimorphia:Didelphidae), from the late Tertiary of the Pampean Region (Argentina). *Zootaxa* 2005:35–46.
- Gordon, C. L. 2003. A first look at estimating body size in dentally conservative marsupials. *Journal of Mammalian Evolution* 10(1/2):1–21.
- Horovitz, I., T. Martin, J. Bloch, S. Ladevèze, C. Kurz, M. R. Sánchez-Villagra. 2009. Cranial anatomy of the earliest marsupials and the origin of opossums. *PLoS ONE* 4(12):e8278. doi:10.1371/journal.pone.0008278
- Ladevèze, S., and C. de Muizon. 2007. The auditory region of early Paleocene Pucadelphyidae (Mammalia, Metatheria) from Tiupampa, Bolivia, with phylogenetic implications. *Palaeontology* 50:1123–1154
- Marshall, L. G. 1976a. New didelphine marsupials from the La Venta fauna (Miocene) of Colombia, South America. *Journal of Paleontology* 50(3):402–418.
- Marshall, L. G. 1976b. Evolution of the Thylacosmilidae, extinct saber-tooth marsupials of South America. *PaleoBios* 23:1–30.
- Marshall, L. G. 1977a. A new species of *Lycopsis* (Borhyaenidae, Marsupialia) from the La Venta fauna (late Miocene) of Columbia, South America. *Journal of Paleontology* 51:633–642.
- Marshall, L. G. 1977b. First Pliocene record of the Water Opossum, *Chironectes minimus* (Didelphidae, Marsupialia). *Journal of Mammalogy* 58:434–436.
- Marshall, L. G. 1978. Evolution of the Borhyaenidae, extinct South American predaceous marsupials. University of California Publications in Geological Sciences 117:1–89.
- Marshall, L. G. 1979. Review of the Prothylacyninae, an extinct subfamily of South America “dog-like” marsupials. *Fieldiana: Geology. New Series* 3:1–50.
- Marshall, L. G. 1981. Review of the Hathylacyninae, an extinct subfamily of South American “dog-like” marsupials. *Fieldiana: Geology. New Series* 7:1–120.
- Marshall, L. G. and C. de Muizon. 1988. The dawn of the age of mammals in South America. *National Geographic Research* 4:23–55.
- Martin, G. M. 2005. Intraspecific variation in *Lestodelphys halli* (Marsupialia: Didelphimorphia) *Journal of Mammalogy* 86:793–802.
- Martín, G. M., and M. F. Tejedor. 2007. Nueva especie de *Pseudonotictis* Ameghino (Metatheria, Sparassodonta, Hathliacynidae) del Mioceno medio de Chubut noroccidental, Argentina. *Ameghiniana* 44(4):747–750.

- Muizon, C. de. 1998. *Mayulestes ferox*, a borhyaenoid (Metatheria, Mammalia) from the early Palaeocene of Bolivia. Phylogenetic and palaeobiologic implications. *Geodiversitas* 20(1):19–142.
- Muizon C. de. 1999. Marsupial skulls from the Deseadan (late Oligocene) of Bolivia and phylogenetic analysis of the Borhyaenoidea (Marsupialia, Mammalia). *Geobios* 32:483–509.
- Muizon, C. de, R. L. Cifelli, and R. C. Paz. 1997. The origin of the dog-like borhyaenoid marsupials of South America. *Nature* 389:486–489.
- Ortiz, P. E., D. A. G. López, M. J. Babot, U. F. J. Pardiñas, P. J. A. Muruaga, and J. P. Jayat. 2012. Exceptional late Pliocene microvertebrate diversity in northwestern Argentina reveals a marked small mammal turnover. *Palaeogeography, Palaeoclimatology, Palaeoecology*. 361-362:21–37.
- Patterson, B., and L. G. Marshall. 1978. The Deseadan, early Oligocene, Marsupialia of South America. *Fieldiana: Geology. New Series* 2:1–100.
- Petter, G., and R. Hoffstetter. 1983. Les marsupiaux de Déséadien (Oligocène inférieur) de Salla (Bolivie). *Annales de Paléontologie* 69:175–234.
- Prevosti, F. J., A. M. Forasiepi, and N. Zimicz. 2013. The evolution of the Cenozoic terrestrial mammal guild in South America: competition or replacement? *Journal of Mammalian Evolution* 20: 3–21.
- Reguero, M. A., and A. M. Candela. 2011. Late Cenozoic mammals from the northwest of Argentina; pp. 411–426 in J. A. Salfity and R. A. Marquillas (eds.), *Cenozoic Geology of the Central Andes of Argentina*.
- Reig, O. A. 1952. Descripción previa de nuevos ungulados y marsupiales fosiles del Plioceno y del Eocuartario Argentinos. *Revista del Museo de Mar del Plata* 1:119–129.
- Reig, O. A. 1957. Sobre la posición sistematica de *Zygolestes paranensis* Amegh. y de *Zygolestes enterrianus* Amegh. con una reconsideración de la edad y correlacion del “Mesopotamiense”. *Holmbergia* 5:209–226.
- Reig, O. A., and G. G. Simpson. 1972. *Sparassocynus* (Marsupialia, Didelphidae), a peculiar mammal from the late Cenozoic of Argentina. *Journal of Zoology* 167:511–539
- Riggs, E. S. 1934. A new marsupial saber-tooth from the Pliocene of Argentina and its relationships to other South American predacious marsupials. *Transactions of the American Philosophical Society* 24:1–31.
- Shockey, B. J. and F. Anaya. 2008. Postcranial osteology of mammals from Salla, Bolivia (late Oligocene): Form, function, and phylogenetic implications; pp. 135-157 in E. J. Sargis and M. Dagosto (eds.), *Mammalian Evolutionary Morphology: A Tribute to Frederick S. Szalay*. Springer, New York. 468 pp.



- Simpson, G. G. 1972. Didelphidae from the Chapadmalal Formation in the Museo Municipal de Ciencias Naturales of Mar del Plata. *Publicaciones del Museo Municipal de Ciencias Naturales de Mar del Plata* 2:1–39.
- Simpson, G. G. 1974. Notes on Didelphidae (Mammalia, Marsupialia) from the Huayquerian (Pliocene) of Argentina. *American Museum Novitates* 2559:1–15.
- Sinclair, W. J. 1906. Mammalia of the Santa Cruz beds: Marsupialia. *Reports of the Princeton University Expeditions to Patagonia* 4:333–460.
- Travouillon, K. J., Y. Gurovich, R. M. D. Beck, and J. Muirhead. 2010. An exceptionally well-preserved short-snouted bandicoot (Marsupialia: Peramelemorphia) from Riversleigh's Oligo-Miocene deposits, northwestern Queensland, Australia. *Journal of Vertebrate Paleontology* 30:1528–1546.
- Villarroel, C. and L. G. Marshall. 1982. Geology of the Deseadan (early Oligocene) age Estratos Salla in the Salla-Luribay Basin, Bolivia, with description of new Marsupialia. *Geobios* 6:201–211.
- Villarroel, C., and L. G. Marshall. 1983. Two new late Tertiary marsupials (Hathylacinae and Sparassocyninae) from the Bolivian Altiplano. *Journal of Paleontology* 57(5):1061–1066.
- Voss, R. S., and S. A. Jansa. 2009. Phylogenetic relationships and classification of didelphid marsupials, an extant radiation of new world metatherian mammals. *Bulletin of the American Museum of Natural History* 322:1–177.

APPENDIX 1S. Predatory marsupial specimens and sources of comparative data used in this study.

| <b>Taxon</b>                     | <b>Group</b>       | <b>Specimen(s)</b>                 | <b>References</b>                         |
|----------------------------------|--------------------|------------------------------------|-------------------------------------------|
| <i>Acrocyon riggsi</i>           | Borhyaenidae       | -                                  | Marshall, 1978                            |
| <i>Acyon myctoderos</i>          | Hathliacynidae     | MNHN-Bol-V-003668                  | Forasiepi et al., 2006; Forasiepi, 2009   |
| <i>Arctodictis munizi</i>        | Borhyaenidae       | MLP 11-85                          | Marshall, 1978; Forasiepi, 2009           |
| <i>Arctodictis sinclairei</i>    | Borhyaenidae       | MLP 85-VII-3-1                     | Forasiepi, 2009                           |
| <i>Arminiheringia auceta</i>     | Proborhyaenidae    | MACN A 10970-10972                 | Babot et al., 2002                        |
| <i>Borhyaena macrodonta</i>      | Borhyaenidae       | MACN A 52-390                      | Marshall, 1978                            |
| <i>Borhyaena tuberata</i>        | Borhyaenidae       | MACN A 5780; MACN A 6203-6265      | Sinclair, 1906; Forasiepi, 2009           |
| <i>Borhyaenidium musteloides</i> | Hathliacynidae     | MLP 57-X-10-153                    | Marshall, 1981                            |
| <i>Borhyaenidium riggsi</i>      | Hathliacynidae     | FMNH 14409                         | Marshall, 1981                            |
| <i>Callistoe vincei</i>          | Proborhyaenidae    | -                                  | Babot et al., 2002; Argot and Babot, 2011 |
| <i>Caluromys derbianus</i>       | Caluromyidae       | FMNH 69327                         | Voss and Jansa, 2009                      |
| <i>Caluromys lanatus</i>         | Caluromyidae       | FMNH 114649                        | Voss and Jansa, 2009                      |
| <i>Caluromys philander</i>       | Caluromyidae       | FMNH 92037                         | Voss and Jansa, 2009                      |
| <i>Cladosictis centralis</i>     | Hathliacynidae     | -                                  | Marshall, 1981                            |
| <i>Cladosictis patagonica</i>    | Hathliacynidae     | MACN A 5927; MACN A 5950           | Marshall, 1981; Forasiepi, 2009           |
| <i>Chironectes minimus</i>       | Didelphidae        | FMNH 19349, FMNH 69329             | Voss and Jansa, 2009                      |
| <i>Dasycercus crassicaudata</i>  | Dasyuridae         | CMNH 18911                         | -                                         |
| <i>Dasyurus maculatus</i>        | Dasyuridae         | CMNH 18912                         | -                                         |
| <i>Dasyurus viverrinus</i>       | Dasyuridae         | CMNH 18913                         | -                                         |
| <i>Didelphis virginiana</i>      | Didelphidae        | CMNH 18880, CMNH 19774, CMNH 19220 | Voss and Jansa, 2009                      |
| <i>Hesperocynus dolgopola</i>    | Sparassocynidae    | -                                  | Forasiepi et al., 2009                    |
| <i>Hondadelphys fieldsi</i>      | Basal Sparassodont | UCMP 37960                         | Marshall, 1976; Goin, 1997;               |

|                                   |                   |                                           |                                                         |
|-----------------------------------|-------------------|-------------------------------------------|---------------------------------------------------------|
|                                   |                   |                                           | Forasiepi, 2009                                         |
| <i>Lutreolina crassicaudata</i>   | Didelphidae       | FMNH 53944                                | Voss and Jansa, 2009                                    |
| <i>Metachirus nudicaudatus</i>    | Didelphidae       | CMNH 18891                                | Voss and Jansa, 2009                                    |
| <i>Marmosa demerarae</i>          | Didelphidae       | CMNH 18894                                | Voss and Jansa, 2009                                    |
| <i>Marmosa murina</i>             | Didelphidae       | CMNH 18878                                | Voss and Jansa, 2009                                    |
| <i>Monodelphis domestica</i>      | Didelphidae       | DAC Teaching Collection                   | Voss and Jansa, 2009                                    |
| <i>'Lycopsis' longirostrus</i>    | Basal Borhyaenoid | UCMP 38061                                | Marshall, 1977a; Goin, 1997;<br>Forasiepi 2009          |
| <i>Lycopsis torresi</i>           | Basal Borhyaenoid | MLP 11-113                                | Marshall, 1979                                          |
| <i>Notogale mitis</i>             | Hathliacynidae    | -                                         | Marshall, 1981                                          |
| <i>Notictis ortizi</i>            | Hathliacynidae    | -                                         | Marshall, 1981                                          |
| <i>Notocynus hermosicus</i>       | Hathliacynidae    | -                                         | Marshall, 1981                                          |
| <i>Patagosmilus goini</i>         | Thylacosmilidae   | -                                         | Forasiepi and Carlini, 2010                             |
| <i>Perathereutes pungens</i>      | Hathliacynidae    | -                                         | Marshall, 1981                                          |
| <i>Proborhyaena gigantea</i>      | Proborhyaenidae   | MLP 79-XII-18-1                           | -                                                       |
| <i>Prothylacynus patagonicus</i>  | Basal Borhyaenoid | MACN A 706; MACN A 5931;<br>MACN Pv 14453 | Marshall, 1979; Forasiepi, 2009                         |
| <i>Pseudonotictis chubutensis</i> | Hathliacynidae    | -                                         | Martín and Tejedor, 2007                                |
| <i>Pseudonotictis pusillus</i>    | Hathliacynidae    | MACN A 666; MLP 11-26                     | Marshall, 1981                                          |
| <i>Sarcophilus harrisii</i>       | Dasyuridae        | CMNH 18915                                | -                                                       |
| <i>Sipalocyon gracilis</i>        | Hathliacynidae    | MACN A 692                                | Marshall, 1981; Forasiepi, 2009                         |
| <i>Sparassocynus derivatus</i>    | Sparassocynidae   | -                                         | Reig and Simpson, 1972                                  |
| <i>Stylocynus paranensis</i>      | Basal Borhyaenoid | MACN A 5893                               | Marshall, 1979; Forasiepi, 2009                         |
| <i>Thylacinus cynocephalus</i>    | Thylacinidae      | CMNH 18916                                | Forasiepi, 2009                                         |
| <i>Thylacosmilus atrox</i>        | Thylacosmilidae   | MLP 35-X-4-1                              | Riggs, 1934; Goin and Pascual,<br>1987; Forasiepi, 2009 |

APPENDIX 2S – List and description of 307 characters used in the phylogenetic analysis. Characters marked by an asterisk (\*) represent ordered characters. Changes in coding from Forasiepi (2009) are noted at the bottom of this appendix.

1. Length of the skull

0 Short (Less than twice width at level of zygomatic arch)

1 Long (Greater than twice width at level of zygomatic arch)

2. Length of rostrum\*

0 Less than 1/3 total length of skull

1 Between 1/3 and 1/2 total length of skull

2 More than 1/2 total length of skull

3. Width of braincase versus maximum postorbital width

0 Braincase wider than maximum postorbital width

1 Braincase narrower than maximum postorbital width

4. Dimensions of braincase

0 As wide as long, or slightly wider than long

1 Much wider than long

5. Level of the palate relative to the basicranium

0 Palate lower than basicranium

1 Palate and basicranium at the same level

6. Paracanine fossa

0 Formed by both maxilla and premaxilla

1 Formed solely by premaxilla

7. Precanine notch

0 Absent

1 Present

8. Lateral palatal process of premaxilla

0 Anterior to or just reaches anterior border of canine alveolus

1 Posterior to anterior border of canine alveolus

9. Posterior border of incisive foramen

0 Anterior to or just reaches anterior border of canine alveolus

1 Posterior to anterior border of canine alveolus

10. Position of medial palatal process of premaxilla

0 Horizontal

1 Inclined dorsally, forming an incisive fossa

11. Dorsal process of premaxilla in narial platform

0 Absent

1 Present

12. Posterioormost point of premaxilla-nasal contact\*

0 Anterior or at the level of the canine

1 Posterior to the canine

2 Posterior to p2

13. Anterior extent of nasals

0 Protrude anteriorly, obscuring the nasal opening in dorsal view

1 Retracted posteriorly, exposing the narial opening in dorsal view

14. Shape of naso-frontal suture

0 Open W-shape or posteriorly convex

1 Acute W or V-shaped

15. Postorbital processes

0 Absent or indistinct

1 Well-developed

16. Fronto-maxillary or naso-lacrimal contact

0 Naso-lacrimal contact

1 Fronto-maxillary contact

17. Angle of maxillo-jugal contact

0 More than 140 degrees

1 Between 95 and 140 degrees

18. Location of the infraorbital foramen\*

0 Anterior or dorsal to the anterior root of P3

1 Dorsal to the posterior root of P3

2 Dorsal to M1

3 Posterior to M1

19. Flaring of maxillary "cheeks" behind infraorbital foramen

0 Present

1 Absent

20. Palatal length/width ratio

0 Less than or equal to 1.5

1 Greater than 1.5

21. Number of palatal pits\*

0 None

1 One (between M3-M4)

2 Two (between M2-M3 and M3-M4)

3 Three (one between each pair of molars)

22. Maxillopalatine fenestrae

0 Absent

1 Present

23. Major palatine foramen

0 One pair opening in maxilla, palatine, or maxillo-palatine suture

1 Many small foramina on the surface of the maxilla

24. Minor palatine foramen\*

0 Large

1 Small

2 Incomplete or absent

25. Posterior extent of palatines

0 Extend to the level of the last molar

1 Extend beyond the level of the last molar

26. Posterior end of palatines

0 Concave posteriorly (single-arched)

1 Concave posteriorly (double-arched)

2 Straight due to presence of a palatine torus

27. Palatine reaches level of infraorbital canal

0 Present

1 Absent

28. Position of sphenorbital foramen

0 Posterior to the level of the posterior border of lacrimal

1 Anterior or at the level of the posterior border of lacrimal

29. Development of pterygoids\*

0 Well-developed and expanded on medial side, with midline contact

1 Well developed and expanded on medial side, but no midline contact

2 Reduced, not expanded on medial side

30. Anterior extent of lacrimal



0 Restricted to orbit

1 Extending onto rostrum

31. Lacrimal tubercle

0 Present

1 Absent

32. Position of lacrimal foramina

0 Within orbit

1 Exposed on face

33. Number of lacrimal foramina

0 Two

1 One

34. Glenoid process of jugal

0 With articular facet

1 Without articular facet

35. Orbital crest

0 Absent

1 Present

36. Interparietal

0 Present

1 Absent

37. Shape of fronto-parietal suture

0 Formed by posterior wedge of frontals

1 Straight

2 Formed by anterior wedge of parietals

38. Parietal-alisphenoid or fronto-squamosal contact

0 Parietal-alisphenoid

1 Fronto-squamosal

39. Width of glenoid cavity

0 Less than twice anteroposterior length

1 More than twice anteroposterior length

40. Distinct preglenoid process of squamosal

0 Absent

1 Present

41. Morphology of postglenoid process\*

0 Wide and low

1 Wider than high

2 As wide as high

42. Location of postglenoid foramen

0 Behind postglenoid process

1 Medial to postglenoid process

43. Suprameatal foramen

0 Above squamosal crest

1 Below squamosal crest

44. External acoustic meatus

0 Longer than wide

1 Wider than long

45. Paracondylar process of exoccipital and post-tympanic process of squamosal

0 Paracondylar process larger

1 Both processes similar in length

46. Orientation of the post-tympanic and/or paracondylar processes

0 Ventrally projecting

1 Anteroventrally projecting

47. Alisphenoid glenoid process

0 Absent

1 Present

48. Optic foramen and sphenorbital fissure

0 Separate (orbital foramen present)

1 Joined (orbital foramen absent)

49. Transverse foramen

0 Absent

1 Present

50. Tympanic process of alisphenoid

0 Absent

1 Present

51. Hypotympanic sinus

0 Absent

1 Formed by squamosal, petrosal, and alisphenoid

2 Formed by alisphenoid and petrosal

52. Medial process of the squamosal

0 Absent

1 Present

53. Concave process of alisphenoid contributing to antero-dorsal portion of hypotympanic sinus

0 Present

1 Absent

54. Extra sinuses posterior to the hypotympanic sinus

0 Absent

1 Present

55. Pneumatization of squamosal

0 Absent

1 Present

56. Eustachian foramen

0 No impression

1 Notch on the alisphenoid

2 Foramen on petrosal

57. Composition of foramen ovale

0 Between petrosal and alisphenoid

1 On alisphenoid

58. Secondary foramen ovale

0 Absent

1 Present

59. Foramen for the greater petrosal nerve

0 Distinct notch or foramen

1 Without distinct notch or foramen

60. Position of carotid foramen

0 Anterior to the basisphenoid-basoccipital suture

1 At the level of the basisphenoid-basoccipital suture

61. Hypoglossal foramina

0 Two or more

1 One

62. Groove between hypoglossal foramina and foramen for inferior petrosal sinus

0 Shallow or absent

1 Well-defined with prominent lateral borders

63. Size of jugular foramen relative to fenestra vestibuli

0 Subequal

1 Larger

64. Jugular fossa

0 Absent

1 Present

65. Median keel in basioccipital

0 Absent

1 Present

66. Median crest of basisphenoid/presphenoid (sphenoid crest)

0 Present

1 Absent

67. Dorsal margin of the foramen magnum

0 Formed only by exoccipitals

1 Formed by both exoccipitals and supraoccipital

68. Mastoid foramen

0 Present

1 Absent

69. Connection between condylar articular facets in ventral view

0 Absent

1 Present

70. Inclination of the major axis of the condyle in posterior view

0 Inclined (less than 55 degrees)

1 Vertical to subvertical (between 90 and 55 degrees)

71. Supraoccipital in posterior view

0 Concave

1 Convex or flat

72. Sagittal crest\*

0 Prominently developed (extending to frontals)

1 Weakly developed (not extending to frontals)

2 Absent

73. Position of nuchal crest

0 At or posterior to the level of the condyles

1 Anterior to the condyles

74. Morphology of the stapes

0 Columelliform (not perforated by stapedial foramen)

1 Bicurrate (perforated by stapedial foramen)

75. Ectotympanic shape

0 Ring-shaped

1 Expanded

76. Position of petrosal

0 At the level of the ventral margin of the braincase

1 Dorsal to the ventral level of the braincase

77. Mastoid portion of the petrosal

0 Contributes to the occipital shield

1 Excluded from the occipital shield

78. Petrosal-squamosal fusion

0 Absent

1 Present

79. Cavum epiptericum

0 Floored by petrosal and alisphenoid

1 Floored primarily or exclusively by alisphenoid

80. Internal acoustic meatus

0 Deep with thick prefacial commissure

1 Shallow with thin prefacial commissure

81. Subarcuate fossa

0 Deep

1 Shallow



82. Deep sulcus for carotid artery on anterior end of promontorium

0 Absent

1 Present

83. Epitympanic wing of petrosal

0 Present

1 Absent

84. Prootic canal

0 Present

1 Absent

85. Rostral tympanic process of petrosal\*

0 Absent or low ridge

1 Tall ridge restricted to the anterior half of the promontorium

2 Tall ridge reaching anterior half of promontorium

86. Paroccipital process of petrosal

0 Distinct process

1 Indistinct or absent

87. Position of hiatus fallopii

0 At a distance from the anterior edge of the petrosal

1 On the anterior edge of the petrosal

88. Stylomastoid foramen

0 Absent

1 Present

89. Floor of cavum supracochleare

0 Absent

1 Present

90. Stapedial ratio

0 Rounded, less than 1.8

1 Elliptical, more than 1.8

91. Contribution of squamosal to epitympanic recess

0 Small

1 Extensive

92. Fossa incudis

0 Continuous with epitympanic recess

1 Separated from the epitympanic recess

93. 'Petrosal crest' (sensu Muizon, 1999)

0 Present

1 Absent

94. Stapedial fossa

0 Twice the size of fenestra vestibuli

1 Small and shallow

95. Foramina for temporal rami

0 On parietal or squamosal

1 Absent

96. Post-temporal canal or notch

0 Present

1 Absent

97. Shape of dentary (depth below m3/m4 embrasure/total length of dentary)\*

0 Shallow (less than 0.15)

1 Intermediate (between 1.5 and 2.0)

2 Deep (greater than 2.0)

98. Ventral margin of jaw behind m4

0 Straight

1 Curved

99. Mandibular symphysis

0 Unfused

1 Fused

100. Posterioormost mental foramen\*

0 Below p3

1 At p3/m1 embrasure

2 Below m1

3 Posterior to m1

101. Retromolar space

0 Absent

1 Present

102. Labial mandibular foramen inside masseteric fossa

0 Absent

1 Present

103. Shape of the angular process\*

0 Shelf-like ( $ASL/AL > 0.81$ )

1 Intermediate ( $0.72 < ASL/AL < 0.81$ )

2 Rod-like ( $ASL/AL < 0.72$ )

104. Angle between anterior edge of coronoid process and tooth row\*

0 Between 95 and 105 degrees

1 Between 106 and 125 degrees

2 Greater than 126 degrees

105. Position of the mandibular foramen\*

0 Posterior to the mid-point of the coronoid process

1 At the mid-point of the coronoid process

2 Anterior to the mid-point of the coronoid process

106. Morphology of mandibular condyle

0 Subspherical

1 Cylindrical

107. Position of mandibular condyle relative to tooth row

0 Below or at level of tooth row

1 Above level of tooth row

108. Number of upper incisors\*

0 Five

1 Four

2 Three

3 Two or fewer

109. Shape of first upper incisor\*

0 Enlarged

1 Subequal to or smaller than remaining incisors

2 Absent

110. Size of I4 versus I3

0 I4 subequal to I3

1 I4 larger

111. Size of I5 versus I4\*

0 I5 subequal to I4

1 I5 smaller than I4

2 I5 absent

112. Shape of upper incisor arcade\*

0 Parabolic

1 Slightly anteriorly convex

2 Transverse

113. Number of lower incisors\*

0 Four

1 Three

2 Two or less

114. Staggered lower incisor

0 Absent

1 Present

115. Shape of canines\*

0 Relatively small

1 Enlarged

2 Hyper-developed and saber-like

116. Roots of canines

0 Closed in adults

1 Open on the upper canines only

2 Open in both pairs of canines

117. Surface of the roots of the canines

0 Smooth

1 With small grooves and ridges

118. Number of premolars

0 Three

1 Two or less

119. Orientation of P1/p1 relative to tooth row\*

0 Parallel to tooth row (less than 19 degrees)

1 Obliquely oriented to tooth row (20 degrees or more)

2 Transversely oriented to tooth row

120. Diastema anterior to P1

0 Absent

1 Present

121. Diastema posterior to P1

0 Present

1 Absent

122. Diastema posterior to p1

0 Present

1 Absent

123. Shape of premolars

0 Uninflated

1 Inflated, with apical wear strongly developed

124. Cusp on the posterior heel of P3

0 Absent or vestigial

1 Well-developed

125. Size of p2

0 Smaller than p3

1 Larger than p3

126. Change in height of lower premolars

0 Increase gradually in height

1 Abrupt change in size between p1 and p2-3

2 Abrupt change in size between p1-2 and p3

127. Roots of lower premolars\*

0 Flat (as wide as crown)

1 Bulbous on only one premolar

2 Bulbous on all premolars and some molars

128. Anterolabial cingulum or cingulid cusp on m2

0 Absent

1 Present

129. Symmetry of main cusp on p3



0 Anterior edge of cusp more convex than posterior edge

1 Both edges similar in curvature

130. Timing of eruption between dP/p3 and M/m3-4

0 P3/p3 and M3/m3 erupt almost simultaneously

1 P3/p3 and M4/m4 erupt almost simultaneously

131. Morphology of dp3

0 With trigonid and talonid

1 With a main cusp and smaller accessory cusps

132. Size of molars increasing posteriorly

0 Moderate posterior increase in size

1 Marked posterior increase in size

133. Width of M4 relative to M3

0 Narrower than M3

1 Wider than M3

134. Size of metacone relative to paracone (based on M2 when possible)\*

0 Slightly smaller

1 Subequal to slightly larger

2 Larger

135. Position of the metacone relative to paracone (based on M2 when possible)

0 Approximately at the same level

1 Lingual

136. Shape of paracone and metacone

0 Conical

1 Subtriangular with a flat labial face

137. Bases of paracone and metacone

0 Adjoined

1 Separate

138. Centrocrista

0 Straight

1 V-shaped

139. Metacone on M4\*

0 Present and distinct

1 Extremely reduced

2 Absent

140. Number of roots on M4

0 Three

1 Two or less

141. Size of protocone\*

0 Vestigial or absent

1 Small and without basin

2 Small, with basin

3 Somewhat expanded anteroposteriorly

4 Greatly expanded anteroposteriorly

142. Height of protocone\*

0 Less than 60% of para/metacone height

1 Between 60 to 80% para/metacone height

2 Greater than or equal to 80% of para/metacone height

143. Paraconule and metaconule

0 Present

1 Absent

144. Wing-like cristae associated with para- and metaconules

0 Absent

1 Present

145. Relative position of para- and metaconule (based on M2 when possible)

0 At or lingual to the midpoint between protocone and para/metacone

1 Closer to the paracone or metacone

146. Orientation of the preparacrista (based on M2 when possible)

0 Nearly perpendicular to long axis of tooth

1 Oriented anterobuccally to long axis of tooth

2 Absent

147. Lengths of preparacrista on M3 and M4

0 M4 preparacrista shorter

1 M4 preparacrista subequal or longer than M3 preparacrista

148. Postmetacrista (based on M3 if possible)

0 Strongly developed (longer than preparacrista)

1 Weakly developed (shorter than preparacrista)

149. Preparacinculum (based on M3 if possible)\*

0 Expanded

1 Short

2 Absent

150. Postcingulum

0 Absent or weakly developed

1 Present

151. Styler shelf (based on M3 if possible)\*

0 Uniform in width, 50% or more of total transverse width

1 Uniform in width, but less than 50% of total transverse width

2 Slightly reduced labial to protocone

3 Strongly reduced labial to protocone

4 Vestigial to absent

152. Deep ectoflexus on upper molars\*

0 On M2 and M3

1 On M3 only

2 Strongly reduced or absent

153. Styler cusp A

0 Smaller than styler cusp B

1 Large, subequal to styler cusp B

154. Styler cusp B

0 Large

1 Small or forming an ectocingulum

2 Vestigial or absent

155. Styler cusp C

0 Absent

1 Present

156. Styler cusp D

0 Absent

1 Present, smaller than styler cusp B

2 Present, larger than styler cusp B

157. Styler cusp E

0 Present and distinct

1 Indistinct or absent

158. Size of m4

0 m4 subequal or smaller than m3

1 m4 larger than m3

159. Posterior lobe of the crown lower than anterior lobe\*

0 Absent

1 Present only on m1-2 and slightly developed

2 Present on m1-3 and strongly developed

160. Talonid of m4 relative to m3

0 Talonid of m4 reduced and narrower than m3

1 Talonid of m4 similar to m3

161. Alignment of the main cusps of m1

0 Reverse triangle acute

1 Single longitudinal row

162. Trigonid configuration posterior to m1\*

0 Open, with paraconid anterolingual

1 Acute, with paraconid more posteriorly placed

2 Anteroposteriorly compressed

163. Metaconid position

0 Aligned with paraconid

1 Metaconid at extreme lingual margin of tooth

164. Orientation of postprotocristid/metacristid

0 Transverse to lower jaw

1 Parallel or oblique to lower jaw

165. Trigonid versus talonid length (m1-m3)\*

0 Trigonid subequal to talonid

1 Trigonid larger than talonid

2 Trigonid smaller than talonid

166. Trigonid versus talonid width (m1-m3)\*

0 Very narrow (subequal to the base of the metaconid or protoconid)

1 Narrow (but wider than the base of the metaconid or protoconid)

2 Subequal to wider than the trigonid

167. Trigonid versus talonid height (based on m2-3)\*

0 Talonid less than 20% of trigonid height

1 Talonid 25-35% of the trigonid height

2 Talonid 40-60% of trigonid height

168. Metaconid on m1

0 Present

1 Absent

169. Metaconid on m2-4

0 Present

1 Absent

170. Paraconid height relative to metaconid (m2-4)\*

0 Taller

1 Subequal

2 Lower

171. Height of protoconid

0 Tallest cusp of the trigonid

1 Subequal to metconid or paraconid

172. Mesiolingual vertical crest of the paraconid

0 Rounded

1 Forming a keel

173. Anterolabial cingulum\*

0 Well-developed, extending from the protoconid to paraconid basins

1 Reduced, extended only on the base of the paraconid

2 Absent

174. Paraconid of m1

0 Distinct

1 Low and confluent with cingulum

175. Length versus width of talonid basin (based on m2 when possible)\*

0 Longer than wide



1 Subequal

2 Wider than long

176. Location and presence of hypoconid

0 Approximately at the middle of the buccal margin of the talonid

1 At the posterobuccal corner of the tooth

2 Absent

177. Shape of the entoconid

0 Conical

1 Labio-lingually compressed

2 Vestigial or absent

178. Height of entoconid

0 Smaller than the hypoconid

1 Subequal to larger than the hypoconid

179. Location of entoconid

0 At the posterolingual corner of the tooth

1 Between the metaconid and posterior tooth margin

180. Position of hypoconulid

0 In posteromedial position

1 Lingually placed and twinned with entoconid

181. Hypoconulid of m4\*

0 Tall

1 Short

2 Absent

182. Pre-entocristid

0 Present

1 Absent

183. Direction of the pre-entocristid

0 To the base of the trigonid

1 Lingual to the trigonid

184. Cristid obliqua\*

0 Lingual to the carnassial notch

1 To the carnassial notch

2 Labial to the carnassial notch

185. Lower molar hypoflexid

0 Deep (40-50% of talonid width)

1 Shallow or absent

186. Carnassial notch in cristid obliqua

0 Absent

1 Present

187. Labial postcingulum

0 Absent

1 Present

188. Atlas intervertebral foramen

0 Absent

1 Present

189. Atlas transverse foramen

0 Absent

1 Present

190. Ventral foramen on transverse process of axis

0 Absent

1 Present

191. Posterior extent of atlantal transverse processes

0 Anterior or just reaches caudal facets for axis

1 Extend caudally beyond level of caudal facets for axis

192. Anterior extent of atlantal transverse processes

0 Does not reach level of atlantal foramen or groove

1 Extends anterior beyond atlantal foramen or groove

193. Shape of cranial facets

0 Only concave

1 Dorsal edge curved

194. Atlas and intercentrum

0 Unfused

1 Fused

195. Axis transverse foramen

0 Absent, represented by a notch

1 Present, enclosed

196. Axis posterior spinous process extension

0 Extends beyond the level of the postzygapophyses

1 Extends to the level of the postzygapophyses

197. C3-C4 ventral sagittal process

0 Absent

1 Present

198. C5 transverse process heads overlap transversally

0 Absent

1 Present

199. C5 and T1 body length

0 C5 subequal or longer than T1

1 C5 shorter than T1

200. C6 spinous process

0 Protuberance

1 Lamina

201. C7 transverse foramen

0 Absent

1 Represented by a notch

2 Complete foramen

202. Shape of anterior face of C7 centrum

0 Circular to ovoid

1 Rectangular to trapezoidal

203. Position of tallest spinous process of thoracic vertebrae

0 On T1

1 On T2

2 On T3

204. Anticlinal vertebra

0 On lumbar

1 On thoracic

2 No anticlinal vertebra

205. Foramen on dorsal arch of last lumbar vertebra

0 Present

1 Absent

206. Metapophyses in third lumbar vertebra anterior to last

0 Absent or weak

1 Present

207. Ventral median keel on lumbar vertebra

0 Absent

1 Present

208. Auricular process of sacrum

0 Developed on two sacral vertebrae

1 Developed on one sacral vertebra

209. Size of sacral spinous process

0 Shorter than last lumbar

1 Taller than last lumbar

210. Length of the tail

0 Shorter than twice the length of the precaudal vertebral column

1 Greater than twice the length of the precaudal vertebral column

211. Angle between scapular spine and dorsal border of scapula

0 Acute or almost straight (between 80 and 95 degrees)

1 Obtuse (between 100 and 110 degrees)

212. Coracoid process

0 Large (extends beyond medial border of glenoid cavity)

1 Small (just reaches medial border of glenoid cavity)

213. Ventral extension of acromion process

0 Extends ventrally below glenoid cavity

1 Does not extend ventrally below glenoid cavity

214. Width of infraspinous fossa

0 Less than 1/4 its length

1 More than 1/4 its length

215. Width of the acromion process at the level of the neck\*

0 Wider than infraspinous fossa

1 Subequal

2 Narrower than infraspinous fossa

216. Infraspinous/supraspinous fossa width at the level of the neck

0 Supraspinous fossa subequal or wider

1 Supraspinous fossa narrower

217. Scapular notch

0 More than 130 degrees

1 Between 90 and 130 degrees

218. Clavicle

0 Present

1 Absent

219. Medial process for teres major

0 Absent

1 Present

220. Tricipital line of humerus\*

0 Absent

1 Ridge or crest

2 Massive crest continuous with deltopectoral crest

221. Capitulum for radius on humerus

0 Spherical

1 Cylindrical

222. Entepicondylar foramen

0 Present

1 Absent

223. Olecranon fossa or foramen

0 Large fossa

1 Foramen

224. Laminar supinator crest/entepicondylar crest\*

0 Large

1 Intermediate

2 Absent

225. Greater tuberosity height relative to humeral head height



0 Greater tuberosity subequal or lower in height to humeral head

1 Greater tuberosity is higher

226. Development of greater tuberosity in proximal view

0 Small (less than half the anteroposterior length of head)

1 Large (greater than or equal to half the anteroposterior length of head)

227. Extension of the deltoid crest

0 Restricted to proximal half of humerus

1 Reaches distal half of humerus

228. End of deltoid crest

0 Merging with diaphysis

1 Forming a distinct angle or process

229. Relative heights of trochlea and capitulum in lateral view\*

0 Longer proximal extension of capitulum

1 Subequal

2 Longer proximal extension of trochlea

230. Humerus medial epicondyle size

0 Large

1 Small

231. Humerus distal end size

0 Large

1 Small

232. Lateral extension of capitulum

0 Rounded

1 Straight

233. Depth of intercondylar notch in posterior view

0 Wide and relatively shallow concave

1 Narrower and concave posteriorly

234. Curvature of the posterior border of the humeral shaft

0 Curved

1 Straight

235. Medial development of the ulnar anconeal process

0 Does not protrude beyond medial border of olecranon process

1 Medially protruding

236. Medial curvature of the ulna

0 Present

1 Absent

237. Posterior border of the ulna

0 Anteriorly curved

1 Straight or posteriorly curved

238. Shape of articular facet for humerus

0 Anteroposteriorly compressed

1 Circular

239. Distal shaft of radius

0 Oval (wider than long)

1 Rounded (almost as wide as long)

240. Prepollex

0 Absent

1 Present

241. Distolateral process of scaphoid\*

0 Absent

1 Present, does not separate lunate from magnum

2 Present, separates lunate from magnum

242. Number of plantar tubercles (distal heads) on trapezium

0 Two

1 One

243. Angle between transverse axis of proximal and distal epiphyses of metacarpal I

0 Absent

1 Present

244. Orientation of ilium relative to ischium

0 Prominent dorsally

1 Aligned with ischium

245. Tuberosity for rectus femoris muscle

0 Absent

1 Protuberance

2 Depression

246. Length of iliac neck\*

0 Longer than 15% total pelvis length

1 Between 6 and 15% total pelvis length

2 Less than 6% total pelvis length

247. Greater sciatic notch

0 Greater than 120 degrees

1 Between 90 and 115 degrees

248. Iliac and gluteous fossa

0 No fossa

1 Two fossa subequal in size

2 Gluteous fossa larger

249. Epipubic bones

0 Present

1 Absent

250. Proximal size of epipubic bones

0 Short

1 Long

251. Torsion between proximal and distal epiphyses of femur

0 Present

1 Absent

252. Relative heights of greater trochanter and femoral head

0 Greater trochanter lower or equal in height to femoral head

1 Greater trochanter higher than femoral head

253. Lesser trochanter of femur

0 Present

1 Vestigial or absent

254. Femoral condyles\*

0 Lateral condyle wider than medial condyle

1 Subequal

2 Medial condyle wider than lateral condyle

255. Ossified patella

0 Absent

1 Present

256. Parafibula

0 Present

1 Absent

257. Femoro-fibular articulation

0 Present

1 Absent

258. Tibia length relative to femur length

0 Tibia subequal to or longer than femur

1 Tibia shorter than femur

259. Proximal dimensions of tibia\*

0 Larger mediolaterally than anteroposteriorly

1 Subequal

2 Larger anteroposteriorly than mediolaterally

260. Tibia shape

0 Sigmoid

1 Straight

261. Torsion between proximal and distal epiphyses of tibia

0 Present

1 Absent

262. Type of distal articulation of tibia

0 Spiral

1 Sagittal

263. Posterior shelf of tibia

0 Present but does not extend posteriorly beyond the medial astragalotibial facet

1 Present and extends posteriorly beyond the medial astragalotibial facet

264. Distal malleolus of tibia

0 Indistinct or absent

1 Distinct

265. Angle between medial and lateral astragalotibial facets\*

0 90 degrees

1 Intermediate

2 180 degrees

266. Astragalonavicular facet extends onto ventromedial side of head

0 Absent

1 Present

267. Width and height of navicular facet in distal view

0 Transversely wider

1 Dorsoventrally wider

268. Visibility of medial plantar tuberosity in dorsal view

0 Not visible

1 Visible

269. Angle between lateral tibial and fibular facets

0 No angle

1 With angle

270. Medial extent of sustentacular facet

0 Does not reach the medial edge of neck

1 Reaches the medial edge of neck

271. Astragalar canal

0 Present

1 Absent

272. Width of astragalar neck

0 Neck wider than head

1 Neck narrower or as wide as head

273. Major orientation of posterior astragalocalcaneal facet

0 Anteromedial-posterolateral

1 Posteromedial-anterolateral

274. Malleolar shelf of astragalus

0 Absent

1 Present

275. Astragalo-distal tuber

0 Absent

1 Present



276. Connection between astragalonavicular facet and sustentacular facet

0 Present

1 Absent

277. Longest dimension of sustentacular facet

0 Anteromedial-posterolateral

1 Sagittally longer

2 Transversely longer

278. Orientation of the calcaneoastagalar facet\*

0 Medial

1 Intermediate

2 Dorsal

279. Calcaneal peroneal tubercle

0 Protuberance

1 Crest-like

280. Position of peroneal tubercle

0 Anterior, non-protruding

1 At a distance from the anterior end of the calcaneus

281. Calcaneal peroneal groove for the peroneous longus

0 Indistinct or weakly developed

1 Distinct, deep separation

282. Position of sustentaculum

0 Reaches anterior end of calcaneus

1 Subterminal

283. Outline of sustentacular process

0 Triangular or rounded

1 Rectangular

284. Mesiolateral orientation of sustentacular facet

0 Medial

1 Dorsal

285. Anteroposterior orientation of sustentacular facet

0 Dorsal

1 45 degrees dorsoanteriorly

286. Sustentacular facet morphology

0 Slightly concave or flat

1 Posteriorly convex

287. Secondary distal calcaneoastragalar facet

0 Absent

1 Present

288. Sustentacular and posterior calcaneoastragalar facets

0 Separate

1 Merged

289. Calcaneal facet for fibula

0 Present

1 Absent

290. Orientation of calcaneal facet for fibula

0 Dorsal

1 Lateral

291. Length of the tuber calci

0 Longer than the body

1 Shorter than the body

292. Medial curvature of the tuber calci

0 Present

1 Absent

293. Ventral curvature of the tuber calci

0 Present

1 Absent

294. Proximal calcaneocuboid facet

0 Absent

1 Present

295. Angle between proximal and distal areas of calcaneocuboid facet

0 No angle

1 Oblique calcaneocuboid facet

296. Spatial relationship between navicular and entocuneiform

0 Entocuneiform anterior to navicular

1 Entocuneiform extends proximally medial to the distal area of the navicular

297. Angle between navicular and distal metatarsal facets of ectocuneiform

0 Oblique

1 Parallel to the distal facet

298. Prehallux

0 Absent

1 Present

299. Metatarsal V proximal process

0 Does not extend ventral to cuboid

1 Extends ventral to cuboid

300. Proximal ends of metatarsal II and III

0 Subequal in length

1 Mt II extends more proximally than Mt III

301. Ridge on proximal articular facet of metatarsal I

0 Absent

1 Present

302. Mt III thickness relative to that of Mt IV
- 0 Mt III thicker or subequal to Mt IV
  - 1 Mt III thinner
303. Mt III thickness relative to that of Mt I
- 0 Mt I thicker than Mt III
  - 1 Mt III thicker than Mt I
304. Median keel on palmar/plantar surface of metapodials
- 0 Sharp
  - 1 Blunt
305. Foot ungual phalanx of digit IV in proximal view
- 0 Larger dorsoventrally than mediolaterally
  - 1 Larger mediolaterally than dorsoventrally
306. Groove on dorsal surface of tip of ungual phalanges
- 0 Absent
  - 1 Present
307. Dorsal border of ungual phalanges
- 0 Forming a crest-like border
  - 1 Rounded

**Changes in Character Coding from Forasiepi (2009)**

## General Changes

- Character 21 (number of palatal pits) has been reordered and state “3” (Three palatal pits) has been added to incorporate UF 27881 and *Sipalocyon*.
- Character 22 (maxillopalatine fenestrae) was termed “palatal vacuities” in Forasiepi (2009). However, several types of palatal vacuities are present in marsupials, the presence or absence of some of which have been considered phylogenetically informative (Voss and Jansa, 2009; Travouillon et al., 2010). On the other hand, none of the species coded “present” for this character in Forasiepi (2009) lack the maxillopalatine fenestrae, and as a result the character has been changed to reflect this feature.
- Character 24 (minor palatine foramen) which represents a clear morphocline, has been considered ordered in this analysis.
- Character 72 (sagittal crest), which represents a clear morphocline, has been reordered and is considered ordered in this analysis.
- Character 103 (shape of the angular process), represents a clear morphocline and has been coded ordered in this analysis.
- Characters 104 (angle between anterior edge of coronoid process and tooth row) and 105 (position of mandibular foramen) represent a clear morphocline, and therefore have been reordered and are considered ordered in this analysis.
- Character 108 (number of upper incisors), state “3” (no upper incisors) is changed to “two or fewer”, after the work of Churcher (1985).
- Characters 109 (shape of first upper incisor) and 111 (size of I5 versus I4) were coded as inapplicable for those taxa where the I1 or I5 were absent, as opposed to making their absence a separate character states. Both characters were coded as unordered.
- Character 116 (roots of canines) was coded as unordered, as it is still uncertain how sparassodonts acquired rootless canines. Coding this character as ordered would imply that rootless upper canines came first, which is not certain.
- Character 134 (size of metacone relative to paracone), represents a clear morphocline and has been coded ordered in this analysis.
- Character 141 (size of protocone), represents a clear morphocline and has been coded ordered in this analysis.
- Character 142 (height of protocone), represents a clear morphocline and has been coded ordered in this analysis.

- Character 152 (deep ectoflexus on upper molars), represents a clear morphocline and has been coded ordered in this analysis.
- Character 165 (trigonid versus talonid length), which represents a clear morphocline, has been reordered and is considered ordered in this analysis.
- Character 166 (trigonid versus talonid width), represents a clear morphocline and has been coded ordered in this analysis.
- Character 167 (trigonid versus talonid height), which represents a clear morphocline, has been reordered and is considered ordered in this analysis.
- Character 170 (paraconid height relative to metaconid on m2-4), represents a clear morphocline and has been coded ordered in this analysis.
- Character 184 (cristid obliqua), which represents a clear morphocline, has been reordered and is considered ordered in this analysis. Taxa for which the cristid oblique is indistinct or absent have been coded as “-”.
- Character 201 (C7 transverse foramen), represents a clear morphocline and has been coded ordered in this analysis.
- Character 220 (tricipital line of humerus), represents a clear morphocline and has been coded ordered in this analysis.
- Character 254 (femoral condyles), represents a clear morphocline and has been coded ordered in this analysis.
- Character 259 (proximal dimensions of tibia), represents a clear morphocline and has been coded ordered in this analysis.
- Character 265 (angle between medial and lateral astragalotibial facets), represents a clear morphocline and has been coded ordered in this analysis.
- Character 278 (orientation of the calcaneoastragalar facet), represents a clear morphocline and has been coded ordered in this analysis.

### **Specific Changes**

- Character 75 (ectotympanic shape) for *Pucadelphys andinus* was coded “0” based on Horovitz et al. (2009) and Beck (2012), character 79 (cavum epiptericum) was coded “0 & 1” based on Ladevèze and Muizon (2007) and

Beck (2012), and characters 193, 203, 265, 268, 269, 270, and 271 were coded based on Horovitz et al. (2009) and Beck (2012).

- Characters 1, 4, 8, 9, 18, 20, 22, 24, 27, 29, 30, 36, 43, 58, 61, 67, 79, 83, 97, 107, 112, 119, 120, 126, 168, 181, 188, 189, 191, 192, 193, 195, 200, 216, 221, 222, 225, 227, 229, 245, 252, 253, 258, 266, 268, 269, 270, 271, 272, 276, 300 were coded for *Andinodelphys cochabambensis* were coded or modified based on Muizon et al. (1997) Ladevèze and Muizon (2007) and cross-referenced with Beck (2012).
- Characters 265, 268, 269, 270, 271, and 276 were coded for *Mayulestes ferox* based on Horovitz et al. (2009) and Beck (2012).
- Characters 57, 79, 83, 84, 89, 96, 108, 143, 215, 216, 220, 225, 231, 245, 252, 253, 257, 258, 259, 262, 263, 265, 266, 267, 268, 269, 270, 271, 272, 273, 276, 279, 280, 282, 284, 285, 286, 288, 289, 290, and 294 for *Herpetotherium* were coded or modified based on Horovitz et al. (2009) and Beck (2012).
- Characters 1, 2, 3, 5, 8, 9, 15, 18, 30, 32, 37, 38, 49, 50, 52, 57, 60, 72, 73, 79, 80, 81 (Beck), 82, 83, 84, 85, 86, 88, 89, 90, 92, 93, 96, 134, 138, 143, 157, 184, 224, 258 for the composite taxon Peradectidae were coded or modified based on Horovitz et al. (2009) and Beck (2012).
- Characters 97, 99, 100, 107, 113, 115, 118, 119, 122, 125, 126, 158, 168, and 181 for *Patene simpsoni* were coded based on Goin et al. (1986)
- *Hondadelphys* has only three lower incisors according to Goin (1997), not four, and as a result character 113 (number of lower incisors) has been modified accordingly.
- For *Notogale mitis*, characters 119 (orientation of P1/p1), 120 (diastema anterior to P1), and 121 (diastema posterior to P1) were coded as “0”, “1”, and “1”, respectively, based on observations of YPM VPPU 021871
- Additional characters for *Notogale mitis*, specifically characters 100 (posteriormost mental foramina), 113 (number of lower incisors), 114 (staggered lower incisor), 115 (size of canines), 118 (number of premolars), 119 (orientation of P/p1 relative to tooth row), 122 (diastema posterior to p1), 125 (size of p2), and 168 (metaconid on m1), were coded based on Villarroel and Marshall (1982).
- Character 100 (posteriormost mental foramina) for *Sallacyon hoffstetteri* was coded “2/3” based on Villarroel and Marshall (1982)
- Character 194 (fusion between atlas and intercentrum) is here coded as polymorphic for *Acyon myctoderos*, based on additional undescribed specimens of this species in the collections of the Florida Museum of Natural History.



- Character 119 (orientation of first premolar to the toothrow) for '*Lycopsis*' *longirostrus* is changed from state "0" (parallel to tooth row) to "1" (obliquely oriented to tooth row), as discoveries of additional specimens of "*L.*" *longirostrus* have shown that the parallel orientation of the first premolar in the specimen described by Marshall (1977a) is due to ontogeny (Goin, 1997).
- Characters 7, 12, 13, 17, 98, 108, 111, 124, 126, 135, and 141 for *Pharsophorus lacerans* were coded or modified based on Patterson and Marshall (1978), Petter and Hoffstetter (1983), or direct observations of specimens of this species by the authors.
- Character 113 (number of lower incisors) was coded "2" (two pairs of incisors or less) for *Paraborhyaena boliviana*, based on specimens mentioned in Shockey and Anaya (2008).
- Characters 2 (length of rostrum) and 73 (position of nuchal crest) for *Paraborhyaena* were coded based on Petter and Hoffstetter (1983).
- Character codings of *Patagosmilus goini* (Carlini and Forasiepi, 2010) and *Callistoe vincei* (Babot et al., 2002; Argot and Babot, 2011) were taken directly from the literature.
